# Supplementary material for: Highly sensitive in vivo detection of dynamic changes in enkephalins following acute stress in mice
Source: eLife journal article supplement (doi:10.7554/elife.91609), 2023-11-17
Supplement: fig1-data1 [file Al-Hasani_050 REV PCS line equations 101421.xlsx]

## Sheet: Summary_data
Peptide	Pep_display	Fragment_ions	LOB	LOD	LLOQ	Robust Intercept	Robust Slope	Curve	Sample	Filename
Leu-enkephalin.YGGFL	Leu-enkephalin.YGG	+1b2+1b3+1y2	0.0366335	0.0392186	0.04	-0.011574	1.15129	Rev	PCS	Al-Hasani_050 REV PCS 101421 regression inputs.txt
Met-enkephalin.YGGFM	Met-enkephalin.YGG	+1b3+1y1+1y2	0.00295713	0.00481836	0.04	-0.0165736	1.09425	Rev	PCS	Al-Hasani_050 REV PCS 101421 regression inputs.txt
