# Supplementary material for: Highly sensitive in vivo detection of dynamic changes in enkephalins following acute stress in mice
Source: eLife journal article supplement (doi:10.7554/elife.91609), 2023-11-17
Supplement: fig1-data1 [file Al-Hasani_056 FWD PCS 101421 individual ions PAR.xlsx]

## Sheet: Al-Hasani_056 fwd PCS 102221 re
Peptide	Replicate	fragment_ions	File_Name	Theor_conc	Sum_heavy	Sum_light	PAR_(L/H)	Meas_conc
Leu-enkephalin.YGGFL	1	+1b2	Al-Hasani_058_4693_3141_12.raw	0	122458424	0	0	0
Leu-enkephalin.YGGFL	2	+1b2	Al-Hasani_058_4693_3142_12.raw	0	132729008	0	0	0
Leu-enkephalin.YGGFL	3	+1b2	Al-Hasani_058_4693_3143_12.raw	0	129123912	0	0	0
Leu-enkephalin.YGGFL	4	+1b2	Al-Hasani_058_4693_3144_12.raw	0	115135800	0	0	0
Leu-enkephalin.YGGFL	5	+1b2	Al-Hasani_058_4693_3145_12.raw	0	109470168	7858	7.17821e-05	0.00179455
Leu-enkephalin.YGGFL	6	+1b2	Al-Hasani_058_4693_3146_12.raw	0	113312632	0	0	0
Leu-enkephalin.YGGFL	7	+1b2	Al-Hasani_058_4693_3147_12.raw	0	100404824	19230	0.000191525	0.00478812
Leu-enkephalin.YGGFL	8	+1b2	Al-Hasani_058_4693_3148_12.raw	0	105486544	33676	0.000319245	0.00798111
Leu-enkephalin.YGGFL	9	+1b2	Al-Hasani_058_4693_3149_12.raw	0	102909840	8955	8.70179e-05	0.00217545	0.00185991
Leu-enkephalin.YGGFL	1	+1b3	Al-Hasani_058_4693_3141_12.raw	0	275869824	9881	3.58176e-05	0.00089544	0.00625231
Leu-enkephalin.YGGFL	2	+1b3	Al-Hasani_058_4693_3142_12.raw	0	296309088	7589	2.56118e-05	0.000640294	0.000352565
Leu-enkephalin.YGGFL	3	+1b3	Al-Hasani_058_4693_3143_12.raw	0	290228800	9867	3.39973e-05	0.000849933
Leu-enkephalin.YGGFL	4	+1b3	Al-Hasani_058_4693_3144_12.raw	0	262645120	124662	0.00047464	0.011866
Leu-enkephalin.YGGFL	5	+1b3	Al-Hasani_058_4693_3145_12.raw	0	246128800	62059	0.00025214	0.00630351
Leu-enkephalin.YGGFL	6	+1b3	Al-Hasani_058_4693_3146_12.raw	0	257613328	57367	0.000222686	0.00556716
Leu-enkephalin.YGGFL	7	+1b3	Al-Hasani_058_4693_3147_12.raw	0	227042720	90844	0.000400119	0.010003
Leu-enkephalin.YGGFL	8	+1b3	Al-Hasani_058_4693_3148_12.raw	0	232765696	108889	0.000467805	0.0116951
Leu-enkephalin.YGGFL	9	+1b3	Al-Hasani_058_4693_3149_12.raw	0	229700944	77642	0.000338013	0.00845034
Leu-enkephalin.YGGFL	1	+1y2	Al-Hasani_058_4693_3141_12.raw	0	76572040	0	0	0
Leu-enkephalin.YGGFL	2	+1y2	Al-Hasani_058_4693_3142_12.raw	0	81707048	0	0	0
Leu-enkephalin.YGGFL	3	+1y2	Al-Hasani_058_4693_3143_12.raw	0	81474608	0	0	0
Leu-enkephalin.YGGFL	4	+1y2	Al-Hasani_058_4693_3144_12.raw	0	72279832	9174	0.000126923	0.00317308
Leu-enkephalin.YGGFL	5	+1y2	Al-Hasani_058_4693_3145_12.raw	0	68719376	0	0	0
Leu-enkephalin.YGGFL	6	+1y2	Al-Hasani_058_4693_3146_12.raw	0	69524352	0	0	0
Leu-enkephalin.YGGFL	7	+1y2	Al-Hasani_058_4693_3147_12.raw	0	62428572	0	0	0
Leu-enkephalin.YGGFL	8	+1y2	Al-Hasani_058_4693_3148_12.raw	0	64316436	0	0	0
Leu-enkephalin.YGGFL	9	+1y2	Al-Hasani_058_4693_3149_12.raw	0	63672420	0	0	0
Leu-enkephalin.YGGFL	1	+1b2	Al-Hasani_058_4693_3141_03.raw	0.04	81849352	77069	0.000941596	0.0235399
Leu-enkephalin.YGGFL	2	+1b2	Al-Hasani_058_4693_3142_03.raw	0.04	79720952	86422	0.00108406	0.0271014
Leu-enkephalin.YGGFL	3	+1b2	Al-Hasani_058_4693_3143_03.raw	0.04	70139232	58225	0.000830135	0.0207534	0.0237982
Leu-enkephalin.YGGFL	1	+1b3	Al-Hasani_058_4693_3141_03.raw	0.04	184341344	226183	0.00122698	0.0306745
Leu-enkephalin.YGGFL	2	+1b3	Al-Hasani_058_4693_3142_03.raw	0.04	181856368	216052	0.00118804	0.0297009
Leu-enkephalin.YGGFL	3	+1b3	Al-Hasani_058_4693_3143_03.raw	0.04	160218032	212143	0.00132409	0.0331022	0.0311592
Leu-enkephalin.YGGFL	1	+1y2	Al-Hasani_058_4693_3141_03.raw	0.04	50896876	21618	0.000424741	0.0106185
Leu-enkephalin.YGGFL	2	+1y2	Al-Hasani_058_4693_3142_03.raw	0.04	48597412	55614	0.00114438	0.0286095
Leu-enkephalin.YGGFL	3	+1y2	Al-Hasani_058_4693_3143_03.raw	0.04	43963788	26853	0.000610798	0.01527	0.018166
Leu-enkephalin.YGGFL	1	+1b2	Al-Hasani_058_4693_3141_04.raw	0.08	129701000	223776	0.00172532	0.0431331
Leu-enkephalin.YGGFL	2	+1b2	Al-Hasani_058_4693_3142_04.raw	0.08	124073640	239180	0.00192773	0.0481932
Leu-enkephalin.YGGFL	3	+1b2	Al-Hasani_058_4693_3143_04.raw	0.08	108390520	220472	0.00203405	0.0508513	0.0473925
Leu-enkephalin.YGGFL	1	+1b3	Al-Hasani_058_4693_3141_04.raw	0.08	291681344	632613	0.00216885	0.0542212
Leu-enkephalin.YGGFL	2	+1b3	Al-Hasani_058_4693_3142_04.raw	0.08	281054112	643407	0.00228926	0.0572316
Leu-enkephalin.YGGFL	3	+1b3	Al-Hasani_058_4693_3143_04.raw	0.08	247885632	562910	0.00227085	0.0567711	0.0560747
Leu-enkephalin.YGGFL	1	+1y2	Al-Hasani_058_4693_3141_04.raw	0.08	80915464	156096	0.00192912	0.0482281
Leu-enkephalin.YGGFL	2	+1y2	Al-Hasani_058_4693_3142_04.raw	0.08	76650032	145231	0.00189473	0.0473682
Leu-enkephalin.YGGFL	3	+1y2	Al-Hasani_058_4693_3143_04.raw	0.08	66921700	109569	0.00163727	0.0409318	0.0455094
Leu-enkephalin.YGGFL	1	+1b2	Al-Hasani_058_4693_3141_05.raw	0.1	165704592	412059	0.00248671	0.0621677
Leu-enkephalin.YGGFL	2	+1b2	Al-Hasani_058_4693_3142_05.raw	0.1	160863296	446054	0.00277288	0.0693219
Leu-enkephalin.YGGFL	3	+1b2	Al-Hasani_058_4693_3143_05.raw	0.1	147357840	391538	0.00265706	0.0664264	0.065972
Leu-enkephalin.YGGFL	1	+1b3	Al-Hasani_058_4693_3141_05.raw	0.1	373924128	1021594	0.00273209	0.0683022
Leu-enkephalin.YGGFL	2	+1b3	Al-Hasani_058_4693_3142_05.raw	0.1	359769024	1122708	0.00312064	0.0780159
Leu-enkephalin.YGGFL	3	+1b3	Al-Hasani_058_4693_3143_05.raw	0.1	326871968	937652	0.00286856	0.071714	0.0726774
Leu-enkephalin.YGGFL	1	+1y2	Al-Hasani_058_4693_3141_05.raw	0.1	101441624	291899	0.00287751	0.0719377
Leu-enkephalin.YGGFL	2	+1y2	Al-Hasani_058_4693_3142_05.raw	0.1	98431120	256190	0.00260273	0.0650683
Leu-enkephalin.YGGFL	3	+1y2	Al-Hasani_058_4693_3143_05.raw	0.1	89426144	198542	0.00222018	0.0555045	0.0641702
Leu-enkephalin.YGGFL	1	+1b2	Al-Hasani_058_4693_3141_06.raw	0.15	118158888	551923	0.00467102	0.116776
Leu-enkephalin.YGGFL	2	+1b2	Al-Hasani_058_4693_3142_06.raw	0.15	113746048	551138	0.00484534	0.121133
Leu-enkephalin.YGGFL	3	+1b2	Al-Hasani_058_4693_3143_06.raw	0.15	99851528	444638	0.00445299	0.111325	0.116411
Leu-enkephalin.YGGFL	1	+1b3	Al-Hasani_058_4693_3141_06.raw	0.15	264303120	1356687	0.00513307	0.128327
Leu-enkephalin.YGGFL	2	+1b3	Al-Hasani_058_4693_3142_06.raw	0.15	259997264	1370387	0.00527077	0.131769
Leu-enkephalin.YGGFL	3	+1b3	Al-Hasani_058_4693_3143_06.raw	0.15	225888832	1069164	0.00473314	0.118329	0.126142
Leu-enkephalin.YGGFL	1	+1y2	Al-Hasani_058_4693_3141_06.raw	0.15	72095600	305298	0.00423463	0.105866
Leu-enkephalin.YGGFL	2	+1y2	Al-Hasani_058_4693_3142_06.raw	0.15	70268784	315582	0.00449107	0.112277
Leu-enkephalin.YGGFL	3	+1y2	Al-Hasani_058_4693_3143_06.raw	0.15	60926328	243032	0.00398895	0.0997237	0.105955
Leu-enkephalin.YGGFL	1	+1b2	Al-Hasani_058_4693_3141_07.raw	0.2	167665616	939826	0.00560536	0.140134
Leu-enkephalin.YGGFL	2	+1b2	Al-Hasani_058_4693_3142_07.raw	0.2	156471664	925165	0.00591267	0.147817
Leu-enkephalin.YGGFL	3	+1b2	Al-Hasani_058_4693_3143_07.raw	0.2	140530720	830424	0.0059092	0.14773	0.145227
Leu-enkephalin.YGGFL	1	+1b3	Al-Hasani_058_4693_3141_07.raw	0.2	374890048	2321114	0.00619145	0.154786
Leu-enkephalin.YGGFL	2	+1b3	Al-Hasani_058_4693_3142_07.raw	0.2	352033120	2311910	0.00656731	0.164183
Leu-enkephalin.YGGFL	3	+1b3	Al-Hasani_058_4693_3143_07.raw	0.2	323456672	1996024	0.00617092	0.154273	0.157747
Leu-enkephalin.YGGFL	1	+1y2	Al-Hasani_058_4693_3141_07.raw	0.2	104298624	566552	0.00543202	0.1358
Leu-enkephalin.YGGFL	2	+1y2	Al-Hasani_058_4693_3142_07.raw	0.2	94874336	575128	0.006062	0.15155
Leu-enkephalin.YGGFL	3	+1y2	Al-Hasani_058_4693_3143_07.raw	0.2	89969368	490240	0.00544897	0.136224	0.141192
Leu-enkephalin.YGGFL	1	+1b2	Al-Hasani_058_4693_3141_08.raw	0.5	103650496	1600122	0.0154377	0.385942
Leu-enkephalin.YGGFL	2	+1b2	Al-Hasani_058_4693_3142_08.raw	0.5	95874016	1480504	0.0154422	0.386055
Leu-enkephalin.YGGFL	3	+1b2	Al-Hasani_058_4693_3143_08.raw	0.5	81431072	1257009	0.0154365	0.385912	0.385969
Leu-enkephalin.YGGFL	1	+1b3	Al-Hasani_058_4693_3141_08.raw	0.5	231882848	3850466	0.0166052	0.415131
Leu-enkephalin.YGGFL	2	+1b3	Al-Hasani_058_4693_3142_08.raw	0.5	217523824	3550782	0.0163236	0.408091
Leu-enkephalin.YGGFL	3	+1b3	Al-Hasani_058_4693_3143_08.raw	0.5	184387824	3125675	0.0169516	0.423791	0.415671
Leu-enkephalin.YGGFL	1	+1y2	Al-Hasani_058_4693_3141_08.raw	0.5	63828304	1000917	0.0156814	0.392035
Leu-enkephalin.YGGFL	2	+1y2	Al-Hasani_058_4693_3142_08.raw	0.5	59402028	918564	0.0154635	0.386588
Leu-enkephalin.YGGFL	3	+1y2	Al-Hasani_058_4693_3143_08.raw	0.5	49704188	765206	0.0153952	0.38488	0.387834
Leu-enkephalin.YGGFL	1	+1b2	Al-Hasani_058_4693_3141_09.raw	1	128934888	4238677	0.0328746	0.821864
Leu-enkephalin.YGGFL	2	+1b2	Al-Hasani_058_4693_3142_09.raw	1	136104352	4086351	0.0300237	0.750592
Leu-enkephalin.YGGFL	3	+1b2	Al-Hasani_058_4693_3143_09.raw	1	114870136	3529268	0.030724	0.7681	0.780185
Leu-enkephalin.YGGFL	1	+1b3	Al-Hasani_058_4693_3141_09.raw	1	291198816	9607148	0.0329917	0.824793
Leu-enkephalin.YGGFL	2	+1b3	Al-Hasani_058_4693_3142_09.raw	1	310583328	9241185	0.0297543	0.743857
Leu-enkephalin.YGGFL	3	+1b3	Al-Hasani_058_4693_3143_09.raw	1	260254048	8248568	0.0316943	0.792357	0.787002
Leu-enkephalin.YGGFL	1	+1y2	Al-Hasani_058_4693_3141_09.raw	1	79286864	2516706	0.0317418	0.793544
Leu-enkephalin.YGGFL	2	+1y2	Al-Hasani_058_4693_3142_09.raw	1	85078024	2476077	0.0291036	0.72759
Leu-enkephalin.YGGFL	3	+1y2	Al-Hasani_058_4693_3143_09.raw	1	71557544	2110929	0.0294997	0.737494	0.752876
Leu-enkephalin.YGGFL	1	+1b2	Al-Hasani_058_4693_3141_10.raw	5	120759360	15906745	0.131723	3.29307
Leu-enkephalin.YGGFL	2	+1b2	Al-Hasani_058_4693_3142_10.raw	5	122596344	15671554	0.127831	3.19576
Leu-enkephalin.YGGFL	3	+1b2	Al-Hasani_058_4693_3143_10.raw	5	96608976	12610707	0.130533	3.26334	3.25072
Leu-enkephalin.YGGFL	1	+1b3	Al-Hasani_058_4693_3141_10.raw	5	272596800	36646304	0.134434	3.36085
Leu-enkephalin.YGGFL	2	+1b3	Al-Hasani_058_4693_3142_10.raw	5	275478080	36677584	0.133142	3.32854
Leu-enkephalin.YGGFL	3	+1b3	Al-Hasani_058_4693_3143_10.raw	5	215495616	29329886	0.136104	3.40261	3.364
Leu-enkephalin.YGGFL	1	+1y2	Al-Hasani_058_4693_3141_10.raw	5	75513256	9876539	0.130792	3.2698
Leu-enkephalin.YGGFL	2	+1y2	Al-Hasani_058_4693_3142_10.raw	5	76086632	9897443	0.130081	3.25203
Leu-enkephalin.YGGFL	3	+1y2	Al-Hasani_058_4693_3143_10.raw	5	59923812	7902087	0.131869	3.29672	3.27285
Leu-enkephalin.YGGFL	1	+1b2	Al-Hasani_058_4693_3141_11.raw	25	95923400	67175376	0.700302	17.5076
Leu-enkephalin.YGGFL	2	+1b2	Al-Hasani_058_4693_3142_11.raw	25	87118856	68776352	0.789454	19.7364
Leu-enkephalin.YGGFL	3	+1b2	Al-Hasani_058_4693_3143_11.raw	25	75577640	52206748	0.69077	17.2692	18.1711
Leu-enkephalin.YGGFL	1	+1b3	Al-Hasani_058_4693_3141_11.raw	25	216542320	154632800	0.7141	17.8525
Leu-enkephalin.YGGFL	2	+1b3	Al-Hasani_058_4693_3142_11.raw	25	198105600	154174896	0.778246	19.4562
Leu-enkephalin.YGGFL	3	+1b3	Al-Hasani_058_4693_3143_11.raw	25	169717520	118318976	0.697152	17.4288	18.2458
Leu-enkephalin.YGGFL	1	+1y2	Al-Hasani_058_4693_3141_11.raw	25	59189052	41513664	0.701374	17.5344
Leu-enkephalin.YGGFL	2	+1y2	Al-Hasani_058_4693_3142_11.raw	25	55049576	42175040	0.766128	19.1532
Leu-enkephalin.YGGFL	3	+1y2	Al-Hasani_058_4693_3143_11.raw	25	46531392	31672254	0.680664	17.0166	17.9014
Met-enkephalin.YGGFM	1	+1b3	Al-Hasani_058_4693_3141_12.raw	0	75073984	0	0	0
Met-enkephalin.YGGFM	2	+1b3	Al-Hasani_058_4693_3142_12.raw	0	93298040	0	0	0
Met-enkephalin.YGGFM	3	+1b3	Al-Hasani_058_4693_3143_12.raw	0	88916560	0	0	0
Met-enkephalin.YGGFM	4	+1b3	Al-Hasani_058_4693_3144_12.raw	0	89838008	0	0	0
Met-enkephalin.YGGFM	5	+1b3	Al-Hasani_058_4693_3145_12.raw	0	85054064	7931	9.32466e-05	0.00233116
Met-enkephalin.YGGFM	6	+1b3	Al-Hasani_058_4693_3146_12.raw	0	88497288	0	0	0
Met-enkephalin.YGGFM	7	+1b3	Al-Hasani_058_4693_3147_12.raw	0	75405128	0	0	0
Met-enkephalin.YGGFM	8	+1b3	Al-Hasani_058_4693_3148_12.raw	0	76871656	1377	1.7913e-05	0.000447824
Met-enkephalin.YGGFM	9	+1b3	Al-Hasani_058_4693_3149_12.raw	0	75535704	0	0	0
Met-enkephalin.YGGFM	1	+1y1	Al-Hasani_058_4693_3141_12.raw	0	133837536	10658	7.96339e-05	0.00199085
Met-enkephalin.YGGFM	2	+1y1	Al-Hasani_058_4693_3142_12.raw	0	164008992	0	0	0
Met-enkephalin.YGGFM	3	+1y1	Al-Hasani_058_4693_3143_12.raw	0	160389376	0	0	0
Met-enkephalin.YGGFM	4	+1y1	Al-Hasani_058_4693_3144_12.raw	0	159614656	0	0	0
Met-enkephalin.YGGFM	5	+1y1	Al-Hasani_058_4693_3145_12.raw	0	151846176	10023	6.60076e-05	0.00165019
Met-enkephalin.YGGFM	6	+1y1	Al-Hasani_058_4693_3146_12.raw	0	159063840	8789	5.52545e-05	0.00138136
Met-enkephalin.YGGFM	7	+1y1	Al-Hasani_058_4693_3147_12.raw	0	132967792	8854	6.65876e-05	0.00166469
Met-enkephalin.YGGFM	8	+1y1	Al-Hasani_058_4693_3148_12.raw	0	137175920	0	0	0
Met-enkephalin.YGGFM	9	+1y1	Al-Hasani_058_4693_3149_12.raw	0	133210456	0	0	0
Met-enkephalin.YGGFM	1	+1y2	Al-Hasani_058_4693_3141_12.raw	0	78951960	0	0	0
Met-enkephalin.YGGFM	2	+1y2	Al-Hasani_058_4693_3142_12.raw	0	96093608	0	0	0
Met-enkephalin.YGGFM	3	+1y2	Al-Hasani_058_4693_3143_12.raw	0	94597104	6941	7.33743e-05	0.00183436
Met-enkephalin.YGGFM	4	+1y2	Al-Hasani_058_4693_3144_12.raw	0	94662656	0	0	0
Met-enkephalin.YGGFM	5	+1y2	Al-Hasani_058_4693_3145_12.raw	0	90025040	5030	5.58733e-05	0.00139683
Met-enkephalin.YGGFM	6	+1y2	Al-Hasani_058_4693_3146_12.raw	0	93878600	0	0	0
Met-enkephalin.YGGFM	7	+1y2	Al-Hasani_058_4693_3147_12.raw	0	79796864	0	0	0
Met-enkephalin.YGGFM	8	+1y2	Al-Hasani_058_4693_3148_12.raw	0	81519640	0	0	0
Met-enkephalin.YGGFM	9	+1y2	Al-Hasani_058_4693_3149_12.raw	0	79015040	0	0	0
Met-enkephalin.YGGFM	1	+1b3	Al-Hasani_058_4693_3141_03.raw	0.04	66055504	79541	0.00120415	0.0301039
Met-enkephalin.YGGFM	2	+1b3	Al-Hasani_058_4693_3142_03.raw	0.04	61814192	77263	0.00124992	0.0312481
Met-enkephalin.YGGFM	3	+1b3	Al-Hasani_058_4693_3143_03.raw	0.04	52605028	51064	0.000970706	0.0242676
Met-enkephalin.YGGFM	1	+1y1	Al-Hasani_058_4693_3141_03.raw	0.04	118514584	153851	0.00129816	0.032454
Met-enkephalin.YGGFM	2	+1y1	Al-Hasani_058_4693_3142_03.raw	0.04	110969832	149034	0.00134301	0.0335753
Met-enkephalin.YGGFM	3	+1y1	Al-Hasani_058_4693_3143_03.raw	0.04	95792312	114719	0.00119758	0.0299395
Met-enkephalin.YGGFM	1	+1y2	Al-Hasani_058_4693_3141_03.raw	0.04	71067648	61782	0.000869341	0.0217335
Met-enkephalin.YGGFM	2	+1y2	Al-Hasani_058_4693_3142_03.raw	0.04	64895488	70602	0.00108793	0.0271983
Met-enkephalin.YGGFM	3	+1y2	Al-Hasani_058_4693_3143_03.raw	0.04	56760952	65593	0.0011556	0.02889
Met-enkephalin.YGGFM	1	+1b3	Al-Hasani_058_4693_3141_04.raw	0.08	108791960	238116	0.00218873	0.0547182
Met-enkephalin.YGGFM	2	+1b3	Al-Hasani_058_4693_3142_04.raw	0.08	99446296	232617	0.00233912	0.058478
Met-enkephalin.YGGFM	3	+1b3	Al-Hasani_058_4693_3143_04.raw	0.08	86283808	191587	0.00222043	0.0555107
Met-enkephalin.YGGFM	1	+1y1	Al-Hasani_058_4693_3141_04.raw	0.08	192231392	434871	0.00226223	0.0565557
Met-enkephalin.YGGFM	2	+1y1	Al-Hasani_058_4693_3142_04.raw	0.08	176966560	402912	0.00227677	0.0569192
Met-enkephalin.YGGFM	3	+1y1	Al-Hasani_058_4693_3143_04.raw	0.08	153277968	379450	0.00247557	0.0618892
Met-enkephalin.YGGFM	1	+1y2	Al-Hasani_058_4693_3141_04.raw	0.08	114882384	261436	0.00227568	0.0568921
Met-enkephalin.YGGFM	2	+1y2	Al-Hasani_058_4693_3142_04.raw	0.08	105997568	235287	0.00221974	0.0554935
Met-enkephalin.YGGFM	3	+1y2	Al-Hasani_058_4693_3143_04.raw	0.08	90267168	196596	0.00217793	0.0544484
Met-enkephalin.YGGFM	1	+1b3	Al-Hasani_058_4693_3141_05.raw	0.1	124946208	416034	0.0033297	0.0832426
Met-enkephalin.YGGFM	2	+1b3	Al-Hasani_058_4693_3142_05.raw	0.1	126834600	435010	0.00342974	0.0857436
Met-enkephalin.YGGFM	3	+1b3	Al-Hasani_058_4693_3143_05.raw	0.1	102285880	327747	0.00320423	0.0801056
Met-enkephalin.YGGFM	1	+1y1	Al-Hasani_058_4693_3141_05.raw	0.1	226366544	728165	0.00321675	0.0804188
Met-enkephalin.YGGFM	2	+1y1	Al-Hasani_058_4693_3142_05.raw	0.1	227212928	732767	0.00322502	0.0806256
Met-enkephalin.YGGFM	3	+1y1	Al-Hasani_058_4693_3143_05.raw	0.1	181139024	573816	0.00316782	0.0791955
Met-enkephalin.YGGFM	1	+1y2	Al-Hasani_058_4693_3141_05.raw	0.1	134394128	415534	0.00309191	0.0772976
Met-enkephalin.YGGFM	2	+1y2	Al-Hasani_058_4693_3142_05.raw	0.1	136276400	405787	0.00297768	0.0744419
Met-enkephalin.YGGFM	3	+1y2	Al-Hasani_058_4693_3143_05.raw	0.1	108628344	326442	0.00300513	0.0751282
Met-enkephalin.YGGFM	1	+1b3	Al-Hasani_058_4693_3141_06.raw	0.15	96691464	557793	0.00576879	0.14422
Met-enkephalin.YGGFM	2	+1b3	Al-Hasani_058_4693_3142_06.raw	0.15	92864592	510057	0.00549248	0.137312
Met-enkephalin.YGGFM	3	+1b3	Al-Hasani_058_4693_3143_06.raw	0.15	76172288	403385	0.00529569	0.132392
Met-enkephalin.YGGFM	1	+1y1	Al-Hasani_058_4693_3141_06.raw	0.15	175580624	1025956	0.00584322	0.14608
Met-enkephalin.YGGFM	2	+1y1	Al-Hasani_058_4693_3142_06.raw	0.15	163604432	907630	0.00554771	0.138693
Met-enkephalin.YGGFM	3	+1y1	Al-Hasani_058_4693_3143_06.raw	0.15	136081680	727485	0.00534594	0.133649
Met-enkephalin.YGGFM	1	+1y2	Al-Hasani_058_4693_3141_06.raw	0.15	102364768	562647	0.00549649	0.137412
Met-enkephalin.YGGFM	2	+1y2	Al-Hasani_058_4693_3142_06.raw	0.15	97718720	553803	0.00566732	0.141683
Met-enkephalin.YGGFM	3	+1y2	Al-Hasani_058_4693_3143_06.raw	0.15	80618888	399836	0.00495958	0.12399
Met-enkephalin.YGGFM	1	+1b3	Al-Hasani_058_4693_3141_07.raw	0.2	132418688	877582	0.00662733	0.165683
Met-enkephalin.YGGFM	2	+1b3	Al-Hasani_058_4693_3142_07.raw	0.2	121226880	881654	0.00727276	0.181819
Met-enkephalin.YGGFM	3	+1b3	Al-Hasani_058_4693_3143_07.raw	0.2	96017256	670226	0.00698027	0.174507
Met-enkephalin.YGGFM	1	+1y1	Al-Hasani_058_4693_3141_07.raw	0.2	237429360	1656850	0.00697829	0.174457
Met-enkephalin.YGGFM	2	+1y1	Al-Hasani_058_4693_3142_07.raw	0.2	214289536	1552160	0.00724328	0.181082
Met-enkephalin.YGGFM	3	+1y1	Al-Hasani_058_4693_3143_07.raw	0.2	172202000	1233619	0.00716379	0.179095
Met-enkephalin.YGGFM	1	+1y2	Al-Hasani_058_4693_3141_07.raw	0.2	141075216	990569	0.00702157	0.175539
Met-enkephalin.YGGFM	2	+1y2	Al-Hasani_058_4693_3142_07.raw	0.2	127948016	910859	0.00711898	0.177974
Met-enkephalin.YGGFM	3	+1y2	Al-Hasani_058_4693_3143_07.raw	0.2	101853912	718537	0.00705458	0.176365
Met-enkephalin.YGGFM	1	+1b3	Al-Hasani_058_4693_3141_08.raw	0.5	78521024	1458510	0.0185748	0.464369
Met-enkephalin.YGGFM	2	+1b3	Al-Hasani_058_4693_3142_08.raw	0.5	71843584	1287037	0.0179144	0.447861
Met-enkephalin.YGGFM	3	+1b3	Al-Hasani_058_4693_3143_08.raw	0.5	58784792	1101734	0.0187418	0.468546
Met-enkephalin.YGGFM	1	+1y1	Al-Hasani_058_4693_3141_08.raw	0.5	139943440	2589081	0.0185009	0.462523
Met-enkephalin.YGGFM	2	+1y1	Al-Hasani_058_4693_3142_08.raw	0.5	126221640	2355814	0.0186641	0.466603
Met-enkephalin.YGGFM	3	+1y1	Al-Hasani_058_4693_3143_08.raw	0.5	103152840	1927191	0.0186829	0.467072
Met-enkephalin.YGGFM	1	+1y2	Al-Hasani_058_4693_3141_08.raw	0.5	83618648	1564942	0.0187152	0.467881
Met-enkephalin.YGGFM	2	+1y2	Al-Hasani_058_4693_3142_08.raw	0.5	75102120	1387492	0.0184747	0.461868
Met-enkephalin.YGGFM	3	+1y2	Al-Hasani_058_4693_3143_08.raw	0.5	61281376	1112179	0.0181487	0.453718
Met-enkephalin.YGGFM	1	+1b3	Al-Hasani_058_4693_3141_09.raw	1	107294312	4205719	0.039198	0.979949
Met-enkephalin.YGGFM	2	+1b3	Al-Hasani_058_4693_3142_09.raw	1	102662032	3941338	0.0383914	0.959785
Met-enkephalin.YGGFM	3	+1b3	Al-Hasani_058_4693_3143_09.raw	1	81866608	3138644	0.0383385	0.958463
Met-enkephalin.YGGFM	1	+1y1	Al-Hasani_058_4693_3141_09.raw	1	192709376	7234023	0.0375385	0.938463
Met-enkephalin.YGGFM	2	+1y1	Al-Hasani_058_4693_3142_09.raw	1	182818336	6610166	0.036157	0.903925
Met-enkephalin.YGGFM	3	+1y1	Al-Hasani_058_4693_3143_09.raw	1	145422496	5520362	0.0379609	0.949021
Met-enkephalin.YGGFM	1	+1y2	Al-Hasani_058_4693_3141_09.raw	1	114887832	4383139	0.0381515	0.953787
Met-enkephalin.YGGFM	2	+1y2	Al-Hasani_058_4693_3142_09.raw	1	108977744	4026509	0.036948	0.9237
Met-enkephalin.YGGFM	3	+1y2	Al-Hasani_058_4693_3143_09.raw	1	87903456	3332644	0.0379125	0.947814
Met-enkephalin.YGGFM	1	+1b3	Al-Hasani_058_4693_3141_10.raw	5	97679240	16586884	0.16981	4.24524
Met-enkephalin.YGGFM	2	+1b3	Al-Hasani_058_4693_3142_10.raw	5	91022952	15268176	0.16774	4.1935
Met-enkephalin.YGGFM	3	+1b3	Al-Hasani_058_4693_3143_10.raw	5	71168552	12520735	0.175931	4.39827
Met-enkephalin.YGGFM	1	+1y1	Al-Hasani_058_4693_3141_10.raw	5	174877136	28607054	0.163584	4.08959
Met-enkephalin.YGGFM	2	+1y1	Al-Hasani_058_4693_3142_10.raw	5	160801200	25810488	0.160512	4.01279
Met-enkephalin.YGGFM	3	+1y1	Al-Hasani_058_4693_3143_10.raw	5	127825584	21452212	0.167824	4.1956
Met-enkephalin.YGGFM	1	+1y2	Al-Hasani_058_4693_3141_10.raw	5	103935880	17607288	0.169405	4.23513
Met-enkephalin.YGGFM	2	+1y2	Al-Hasani_058_4693_3142_10.raw	5	95169864	15703280	0.165003	4.12507
Met-enkephalin.YGGFM	3	+1y2	Al-Hasani_058_4693_3143_10.raw	5	75415808	12769933	0.169327	4.23318
Met-enkephalin.YGGFM	1	+1b3	Al-Hasani_058_4693_3141_11.raw	25	77324088	65606012	0.848455	21.2114
Met-enkephalin.YGGFM	2	+1b3	Al-Hasani_058_4693_3142_11.raw	25	69358200	59463228	0.857335	21.4334
Met-enkephalin.YGGFM	3	+1b3	Al-Hasani_058_4693_3143_11.raw	25	55270076	46462292	0.840641	21.016
Met-enkephalin.YGGFM	1	+1y1	Al-Hasani_058_4693_3141_11.raw	25	141194032	111679216	0.790963	19.7741
Met-enkephalin.YGGFM	2	+1y1	Al-Hasani_058_4693_3142_11.raw	25	123488832	101525536	0.822143	20.5536
Met-enkephalin.YGGFM	3	+1y1	Al-Hasani_058_4693_3143_11.raw	25	97963456	79377064	0.810272	20.2568
Met-enkephalin.YGGFM	1	+1y2	Al-Hasani_058_4693_3141_11.raw	25	84135384	67456096	0.801757	20.0439
Met-enkephalin.YGGFM	2	+1y2	Al-Hasani_058_4693_3142_11.raw	25	73798752	61712488	0.836227	20.9057
Met-enkephalin.YGGFM	3	+1y2	Al-Hasani_058_4693_3143_11.raw	25	58492556	47929460	0.819411	20.4853
