# Supplementary material for: Highly sensitive in vivo detection of dynamic changes in enkephalins following acute stress in mice
Source: eLife journal article supplement (doi:10.7554/elife.91609), 2023-11-17
Supplement: fig1-data1 [file Al-Hasani_056 FWD PCS line equations 102221.xlsx]

## Sheet: Summary_data
Peptide	LOB	LOD	LLOQ	lmRob_intercept	lmRob_slope	Curve	Sample	Filename
Leu-enkephalin.YGGFL	0.00899376	0.0179377	0.4	-0.00742463	0.789758	Fwd	PCS	Al-Hasani_056 fwd PCS 102221 regression inputs.txt
Met-enkephalin.YGGFM	0.00172407	0.00758093	0.4	-0.014064	0.959691	Fwd	PCS	Al-Hasani_056 fwd PCS 102221 regression inputs.txt
