# Supplementary material for: Highly sensitive in vivo detection of dynamic changes in enkephalins following acute stress in mice
Source: eLife journal article supplement (doi:10.7554/elife.91609), 2023-11-17
Supplement: fig1-data1 [file elife-91609-fig1-data1-v1.zip]

## Sheet: Al-Hasani_050 REV PCS 101421 re
Peptide	Replicate	fragment_ions	File_Name	Theor_conc	Sum_heavy	Sum_light	PAR_(H/L)	Meas_conc
Leu-enkephalin.YGGFL	1	+1b2	Al-Hasani_050_4631_3151_01.raw	0.005	87629	194426080	0.000450706	0.0112676
Leu-enkephalin.YGGFL	1	+1b3	Al-Hasani_050_4631_3151_01.raw	0.005	152662	348726784	0.00043777	0.0109442
Leu-enkephalin.YGGFL	1	+1y2	Al-Hasani_050_4631_3151_01.raw	0.005	0	88313264	0	0
Leu-enkephalin.YGGFL	1	+1b2	Al-Hasani_050_4631_3151_02.raw	0.01	140753	204389600	0.00068865	0.0172163
Leu-enkephalin.YGGFL	1	+1b3	Al-Hasani_050_4631_3151_02.raw	0.01	307135	362821600	0.000846518	0.0211629
Leu-enkephalin.YGGFL	1	+1y2	Al-Hasani_050_4631_3151_02.raw	0.01	0	93310840	0	0
Leu-enkephalin.YGGFL	1	+1b2	Al-Hasani_050_4631_3151_03.raw	0.02	301059	214297184	0.00140487	0.0351217
Leu-enkephalin.YGGFL	1	+1b3	Al-Hasani_050_4631_3151_03.raw	0.02	611070	385991168	0.00158312	0.039578
Leu-enkephalin.YGGFL	1	+1y2	Al-Hasani_050_4631_3151_03.raw	0.02	102126	99302800	0.00102843	0.0257108
Leu-enkephalin.YGGFL	1	+1b2	Al-Hasani_050_4631_3151_04.raw	0.04	339253	197149392	0.00172079	0.0430198
Leu-enkephalin.YGGFL	1	+1b3	Al-Hasani_050_4631_3151_04.raw	0.04	684108	352005248	0.00194346	0.0485865
Leu-enkephalin.YGGFL	1	+1y2	Al-Hasani_050_4631_3151_04.raw	0.04	152054	90863952	0.00167342	0.0418356
Leu-enkephalin.YGGFL	1	+1b2	Al-Hasani_050_4631_3151_05.raw	0.06	468687	203892448	0.0022987	0.0574674
Leu-enkephalin.YGGFL	1	+1b3	Al-Hasani_050_4631_3151_05.raw	0.06	884125	372656544	0.00237249	0.0593123
Leu-enkephalin.YGGFL	1	+1y2	Al-Hasani_050_4631_3151_05.raw	0.06	178033	93705912	0.00189991	0.0474978
Leu-enkephalin.YGGFL	1	+1b2	Al-Hasani_050_4631_3151_06.raw	0.08	634607	189973792	0.0033405	0.0835124
Leu-enkephalin.YGGFL	1	+1b3	Al-Hasani_050_4631_3151_06.raw	0.08	1122631	339721856	0.00330456	0.082614
Leu-enkephalin.YGGFL	1	+1y2	Al-Hasani_050_4631_3151_06.raw	0.08	244741	86082848	0.00284309	0.0710772
Leu-enkephalin.YGGFL	1	+1b2	Al-Hasani_050_4631_3151_07.raw	0.1	455113	128133224	0.00355187	0.0887968
Leu-enkephalin.YGGFL	1	+1b3	Al-Hasani_050_4631_3151_07.raw	0.1	883849	228514160	0.00386781	0.0966952
Leu-enkephalin.YGGFL	1	+1y2	Al-Hasani_050_4631_3151_07.raw	0.1	129384	57328332	0.00225689	0.0564224
Leu-enkephalin.YGGFL	1	+1b2	Al-Hasani_050_4631_3151_08.raw	0.25	2271489	207555648	0.010944	0.2736
Leu-enkephalin.YGGFL	1	+1b3	Al-Hasani_050_4631_3151_08.raw	0.25	4056192	360422912	0.011254	0.281349
Leu-enkephalin.YGGFL	1	+1y2	Al-Hasani_050_4631_3151_08.raw	0.25	906770	90600280	0.0100085	0.250212
Leu-enkephalin.YGGFL	1	+1b2	Al-Hasani_050_4631_3151_09.raw	0.5	5294770	235822992	0.0224523	0.561308
Leu-enkephalin.YGGFL	1	+1b3	Al-Hasani_050_4631_3151_09.raw	0.5	9479240	421101248	0.0225106	0.562765
Leu-enkephalin.YGGFL	1	+1y2	Al-Hasani_050_4631_3151_09.raw	0.5	2312492	106898880	0.0216325	0.540813
Leu-enkephalin.YGGFL	1	+1b2	Al-Hasani_050_4631_3151_10.raw	1	7567229	165334784	0.0457691	1.14423
Leu-enkephalin.YGGFL	1	+1b3	Al-Hasani_050_4631_3151_10.raw	1	13544307	294214752	0.0460354	1.15089
Leu-enkephalin.YGGFL	1	+1y2	Al-Hasani_050_4631_3151_10.raw	1	3263622	75071880	0.0434733	1.08683
Leu-enkephalin.YGGFL	1	+1b2	Al-Hasani_050_4631_3151_11.raw	5	50918448	218127856	0.233434	5.83585
Leu-enkephalin.YGGFL	1	+1b3	Al-Hasani_050_4631_3151_11.raw	5	88858632	385785280	0.230332	5.7583
Leu-enkephalin.YGGFL	1	+1y2	Al-Hasani_050_4631_3151_11.raw	5	22304566	98245240	0.227029	5.67574
Leu-enkephalin.YGGFL	1	+1b2	Al-Hasani_050_4631_3151_12.raw	0	46079	231980208	0.000198633	0.00496583
Leu-enkephalin.YGGFL	1	+1b3	Al-Hasani_050_4631_3151_12.raw	0	110127	415782208	0.000264867	0.00662168
Leu-enkephalin.YGGFL	1	+1y2	Al-Hasani_050_4631_3151_12.raw	0	0	104910864	0	0
Leu-enkephalin.YGGFL	2	+1b2	Al-Hasani_050_4631_3152_01.raw	0.005	56571	210414048	0.000268856	0.00672139
Leu-enkephalin.YGGFL	2	+1b3	Al-Hasani_050_4631_3152_01.raw	0.005	161869	368496736	0.000439268	0.0109817
Leu-enkephalin.YGGFL	2	+1y2	Al-Hasani_050_4631_3152_01.raw	0.005	9201	92706520	9.92487e-05	0.00248122
Leu-enkephalin.YGGFL	2	+1b2	Al-Hasani_050_4631_3152_02.raw	0.01	123162	214260496	0.000574824	0.0143706
Leu-enkephalin.YGGFL	2	+1b3	Al-Hasani_050_4631_3152_02.raw	0.01	264417	373818144	0.000707341	0.0176835
Leu-enkephalin.YGGFL	2	+1y2	Al-Hasani_050_4631_3152_02.raw	0.01	0	94523120	0	0
Leu-enkephalin.YGGFL	2	+1b2	Al-Hasani_050_4631_3152_03.raw	0.02	331526	210548448	0.00157458	0.0393646
Leu-enkephalin.YGGFL	2	+1b3	Al-Hasani_050_4631_3152_03.raw	0.02	616615	366728224	0.00168139	0.0420349
Leu-enkephalin.YGGFL	2	+1y2	Al-Hasani_050_4631_3152_03.raw	0.02	96510	92635976	0.00104182	0.0260455
Leu-enkephalin.YGGFL	2	+1b2	Al-Hasani_050_4631_3152_04.raw	0.04	332907	211012096	0.00157767	0.0394417
Leu-enkephalin.YGGFL	2	+1b3	Al-Hasani_050_4631_3152_04.raw	0.04	723288	359805088	0.00201022	0.0502555
Leu-enkephalin.YGGFL	2	+1y2	Al-Hasani_050_4631_3152_04.raw	0.04	125745	90737976	0.0013858	0.0346451
Leu-enkephalin.YGGFL	2	+1b2	Al-Hasani_050_4631_3152_05.raw	0.06	558924	220834672	0.00253096	0.063274
Leu-enkephalin.YGGFL	2	+1b3	Al-Hasani_050_4631_3152_05.raw	0.06	1023730	386794944	0.0026467	0.0661675
Leu-enkephalin.YGGFL	2	+1y2	Al-Hasani_050_4631_3152_05.raw	0.06	163167	98394592	0.00165829	0.0414573
Leu-enkephalin.YGGFL	2	+1b2	Al-Hasani_050_4631_3152_06.raw	0.08	611239	198882432	0.00307337	0.0768342
Leu-enkephalin.YGGFL	2	+1b3	Al-Hasani_050_4631_3152_06.raw	0.08	1228502	347078976	0.00353955	0.0884886
Leu-enkephalin.YGGFL	2	+1y2	Al-Hasani_050_4631_3152_06.raw	0.08	259819	87642896	0.00296452	0.074113
Leu-enkephalin.YGGFL	2	+1b2	Al-Hasani_050_4631_3152_07.raw	0.1	664645	156676432	0.00424215	0.106054
Leu-enkephalin.YGGFL	2	+1b3	Al-Hasani_050_4631_3152_07.raw	0.1	1159453	273142592	0.00424486	0.106122
Leu-enkephalin.YGGFL	2	+1y2	Al-Hasani_050_4631_3152_07.raw	0.1	198069	69612464	0.00284531	0.0711327
Leu-enkephalin.YGGFL	2	+1b2	Al-Hasani_050_4631_3152_08.raw	0.25	2083441	206881680	0.0100707	0.251767
Leu-enkephalin.YGGFL	2	+1b3	Al-Hasani_050_4631_3152_08.raw	0.25	3861763	360163584	0.0107222	0.268056
Leu-enkephalin.YGGFL	2	+1y2	Al-Hasani_050_4631_3152_08.raw	0.25	872260	90372584	0.00965182	0.241296
Leu-enkephalin.YGGFL	2	+1b2	Al-Hasani_050_4631_3152_09.raw	0.5	5195517	227811744	0.0228062	0.570155
Leu-enkephalin.YGGFL	2	+1b3	Al-Hasani_050_4631_3152_09.raw	0.5	9242603	395065760	0.0233951	0.584878
Leu-enkephalin.YGGFL	2	+1y2	Al-Hasani_050_4631_3152_09.raw	0.5	2255439	101196648	0.0222877	0.557192
Leu-enkephalin.YGGFL	2	+1b2	Al-Hasani_050_4631_3152_10.raw	1	7440309	164986912	0.0450964	1.12741
Leu-enkephalin.YGGFL	2	+1b3	Al-Hasani_050_4631_3152_10.raw	1	13058367	286917440	0.0455126	1.13782
Leu-enkephalin.YGGFL	2	+1y2	Al-Hasani_050_4631_3152_10.raw	1	3104706	72546160	0.0427963	1.06991
Leu-enkephalin.YGGFL	2	+1b2	Al-Hasani_050_4631_3152_11.raw	5	49589044	212426080	0.233441	5.83604
Leu-enkephalin.YGGFL	2	+1b3	Al-Hasani_050_4631_3152_11.raw	5	84835080	368932160	0.229948	5.74869
Leu-enkephalin.YGGFL	2	+1y2	Al-Hasani_050_4631_3152_11.raw	5	21443210	93275392	0.229891	5.74728
Leu-enkephalin.YGGFL	2	+1b2	Al-Hasani_050_4631_3152_12.raw	0	15144	200687168	7.54607e-05	0.00188652
Leu-enkephalin.YGGFL	2	+1b3	Al-Hasani_050_4631_3152_12.raw	0	100712	358872896	0.000280634	0.00701585
Leu-enkephalin.YGGFL	2	+1y2	Al-Hasani_050_4631_3152_12.raw	0	0	92837224	0	0
Leu-enkephalin.YGGFL	3	+1b2	Al-Hasani_050_4631_3153_01.raw	0.005	75392	200531360	0.000375961	0.00939903
Leu-enkephalin.YGGFL	3	+1b3	Al-Hasani_050_4631_3153_01.raw	0.005	195856	348979392	0.000561225	0.0140306
Leu-enkephalin.YGGFL	3	+1y2	Al-Hasani_050_4631_3153_01.raw	0.005	8426	88370424	9.53486e-05	0.00238372
Leu-enkephalin.YGGFL	3	+1b2	Al-Hasani_050_4631_3153_02.raw	0.01	137411	204838016	0.000670828	0.0167707
Leu-enkephalin.YGGFL	3	+1b3	Al-Hasani_050_4631_3153_02.raw	0.01	220759	355512800	0.000620959	0.015524
Leu-enkephalin.YGGFL	3	+1y2	Al-Hasani_050_4631_3153_02.raw	0.01	9285	90550304	0.00010254	0.00256349
Leu-enkephalin.YGGFL	3	+1b2	Al-Hasani_050_4631_3153_03.raw	0.02	343571	206939456	0.00166025	0.0415062
Leu-enkephalin.YGGFL	3	+1b3	Al-Hasani_050_4631_3153_03.raw	0.02	595013	351957888	0.00169058	0.0422645
Leu-enkephalin.YGGFL	3	+1y2	Al-Hasani_050_4631_3153_03.raw	0.02	95925	88719776	0.00108121	0.0270303
Leu-enkephalin.YGGFL	3	+1b2	Al-Hasani_050_4631_3153_04.raw	0.04	335889	206921024	0.00162327	0.0405818
Leu-enkephalin.YGGFL	3	+1b3	Al-Hasani_050_4631_3153_04.raw	0.04	691085	359536096	0.00192216	0.0480539
Leu-enkephalin.YGGFL	3	+1y2	Al-Hasani_050_4631_3153_04.raw	0.04	121771	89873032	0.00135492	0.0338731
Leu-enkephalin.YGGFL	3	+1b2	Al-Hasani_050_4631_3153_05.raw	0.06	489929	216300544	0.00226504	0.056626
Leu-enkephalin.YGGFL	3	+1b3	Al-Hasani_050_4631_3153_05.raw	0.06	960535	379920416	0.00252825	0.0632063
Leu-enkephalin.YGGFL	3	+1y2	Al-Hasani_050_4631_3153_05.raw	0.06	193084	95581088	0.00202011	0.0505027
Leu-enkephalin.YGGFL	3	+1b2	Al-Hasani_050_4631_3153_06.raw	0.08	502325	157911344	0.00318106	0.0795264
Leu-enkephalin.YGGFL	3	+1b3	Al-Hasani_050_4631_3153_06.raw	0.08	972124	270271040	0.00359685	0.0899212
Leu-enkephalin.YGGFL	3	+1y2	Al-Hasani_050_4631_3153_06.raw	0.08	192392	68260344	0.0028185	0.0704626
Leu-enkephalin.YGGFL	3	+1b2	Al-Hasani_050_4631_3153_07.raw	0.1	364610	103911680	0.00350885	0.0877211
Leu-enkephalin.YGGFL	3	+1b3	Al-Hasani_050_4631_3153_07.raw	0.1	669071	174711360	0.00382958	0.0957395
Leu-enkephalin.YGGFL	3	+1y2	Al-Hasani_050_4631_3153_07.raw	0.1	110594	44098552	0.00250788	0.0626971
Leu-enkephalin.YGGFL	3	+1b2	Al-Hasani_050_4631_3153_08.raw	0.25	2088594	192231472	0.010865	0.271625
Leu-enkephalin.YGGFL	3	+1b3	Al-Hasani_050_4631_3153_08.raw	0.25	3663939	336442752	0.0108902	0.272256
Leu-enkephalin.YGGFL	3	+1y2	Al-Hasani_050_4631_3153_08.raw	0.25	868744	86015464	0.0100999	0.252496
Leu-enkephalin.YGGFL	3	+1b2	Al-Hasani_050_4631_3153_09.raw	0.5	5043372	224162000	0.0224988	0.56247
Leu-enkephalin.YGGFL	3	+1b3	Al-Hasani_050_4631_3153_09.raw	0.5	8869247	391355296	0.0226629	0.566573
Leu-enkephalin.YGGFL	3	+1y2	Al-Hasani_050_4631_3153_09.raw	0.5	2067457	99691704	0.0207385	0.518463
Leu-enkephalin.YGGFL	3	+1b2	Al-Hasani_050_4631_3153_10.raw	1	7157178	156935840	0.0456058	1.14014
Leu-enkephalin.YGGFL	3	+1b3	Al-Hasani_050_4631_3153_10.raw	1	12358939	273522912	0.0451843	1.12961
Leu-enkephalin.YGGFL	3	+1y2	Al-Hasani_050_4631_3153_10.raw	1	2948710	68735568	0.0428993	1.07248
Leu-enkephalin.YGGFL	3	+1b2	Al-Hasani_050_4631_3153_11.raw	5	47301128	205555808	0.230113	5.75283
Leu-enkephalin.YGGFL	3	+1b3	Al-Hasani_050_4631_3153_11.raw	5	80886248	353153440	0.22904	5.726
Leu-enkephalin.YGGFL	3	+1y2	Al-Hasani_050_4631_3153_11.raw	5	20240942	89000224	0.227426	5.68564
Leu-enkephalin.YGGFL	3	+1b2	Al-Hasani_050_4631_3153_12.raw	0	0	200208384	0	0
Leu-enkephalin.YGGFL	3	+1b3	Al-Hasani_050_4631_3153_12.raw	0	104578	359974240	0.000290515	0.00726288
Leu-enkephalin.YGGFL	3	+1y2	Al-Hasani_050_4631_3153_12.raw	0	0	93051440	0	0
Leu-enkephalin.YGGFL	4	+1b2	Al-Hasani_050_4631_3154_12.raw	0	471475	214470176	0.00219832	0.0549581
Leu-enkephalin.YGGFL	4	+1b3	Al-Hasani_050_4631_3154_12.raw	0	814325	381235232	0.00213602	0.0534004
Leu-enkephalin.YGGFL	4	+1y2	Al-Hasani_050_4631_3154_12.raw	0	159557	97733264	0.00163258	0.0408144
Leu-enkephalin.YGGFL	5	+1b2	Al-Hasani_050_4631_3155_12.raw	0	293702	213556576	0.00137529	0.0343822
Leu-enkephalin.YGGFL	5	+1b3	Al-Hasani_050_4631_3155_12.raw	0	494719	376753120	0.00131311	0.0328278
Leu-enkephalin.YGGFL	5	+1y2	Al-Hasani_050_4631_3155_12.raw	0	101451	95373616	0.00106372	0.026593
Leu-enkephalin.YGGFL	6	+1b2	Al-Hasani_050_4631_3156_12.raw	0	188703	212988624	0.000885977	0.0221494
Leu-enkephalin.YGGFL	6	+1b3	Al-Hasani_050_4631_3156_12.raw	0	354159	373736256	0.000947617	0.0236904
Leu-enkephalin.YGGFL	6	+1y2	Al-Hasani_050_4631_3156_12.raw	0	25265	94546016	0.000267224	0.00668061
Leu-enkephalin.YGGFL	7	+1b2	Al-Hasani_050_4631_3157_12.raw	0	80599	184642000	0.000436515	0.0109129
Leu-enkephalin.YGGFL	7	+1b3	Al-Hasani_050_4631_3157_12.raw	0	177544	315420960	0.00056288	0.014072
Leu-enkephalin.YGGFL	7	+1y2	Al-Hasani_050_4631_3157_12.raw	0	6900	79724504	8.6548e-05	0.0021637
Leu-enkephalin.YGGFL	8	+1b2	Al-Hasani_050_4631_3158_12.raw	0	76205	211618224	0.000360106	0.00900265
Leu-enkephalin.YGGFL	8	+1b3	Al-Hasani_050_4631_3158_12.raw	0	229906	366163872	0.000627877	0.0156969
Leu-enkephalin.YGGFL	8	+1y2	Al-Hasani_050_4631_3158_12.raw	0	0	92582688	0	0
Leu-enkephalin.YGGFL	9	+1b2	Al-Hasani_050_4631_3159_12.raw	0	70264	174418384	0.000402847	0.0100712
Leu-enkephalin.YGGFL	9	+1b3	Al-Hasani_050_4631_3159_12.raw	0	164585	302408224	0.000544248	0.0136062
Leu-enkephalin.YGGFL	9	+1y2	Al-Hasani_050_4631_3159_12.raw	0	7590	75378184	0.000100692	0.00251731
Met-enkephalin.YGGFM	1	+1b3	Al-Hasani_050_4631_3151_01.raw	0.005	14019	141570048	9.90252e-05	0.00247563
Met-enkephalin.YGGFM	1	+1y1	Al-Hasani_050_4631_3151_01.raw	0.005	22534	266327696	8.46101e-05	0.00211525
Met-enkephalin.YGGFM	1	+1y2	Al-Hasani_050_4631_3151_01.raw	0.005	0	138815296	0	0
Met-enkephalin.YGGFM	1	+1b3	Al-Hasani_050_4631_3151_02.raw	0.01	0	145623184	0	0
Met-enkephalin.YGGFM	1	+1y1	Al-Hasani_050_4631_3151_02.raw	0.01	38528	275724832	0.000139734	0.00349334
Met-enkephalin.YGGFM	1	+1y2	Al-Hasani_050_4631_3151_02.raw	0.01	0	142389648	0	0
Met-enkephalin.YGGFM	1	+1b3	Al-Hasani_050_4631_3151_03.raw	0.02	161678	149926864	0.00107838	0.0269595
Met-enkephalin.YGGFM	1	+1y1	Al-Hasani_050_4631_3151_03.raw	0.02	329414	280628256	0.00117384	0.0293461
Met-enkephalin.YGGFM	1	+1y2	Al-Hasani_050_4631_3151_03.raw	0.02	162524	145590928	0.00111631	0.0279076
Met-enkephalin.YGGFM	1	+1b3	Al-Hasani_050_4631_3151_04.raw	0.04	211647	142578896	0.00148442	0.0371105
Met-enkephalin.YGGFM	1	+1y1	Al-Hasani_050_4631_3151_04.raw	0.04	468319	268773408	0.00174243	0.0435608
Met-enkephalin.YGGFM	1	+1y2	Al-Hasani_050_4631_3151_04.raw	0.04	156570	139583744	0.00112169	0.0280423
Met-enkephalin.YGGFM	1	+1b3	Al-Hasani_050_4631_3151_05.raw	0.06	239505	150460912	0.00159181	0.0397952
Met-enkephalin.YGGFM	1	+1y1	Al-Hasani_050_4631_3151_05.raw	0.06	586734	283165824	0.00207205	0.0518013
Met-enkephalin.YGGFM	1	+1y2	Al-Hasani_050_4631_3151_05.raw	0.06	213592	148236688	0.00144088	0.0360221
Met-enkephalin.YGGFM	1	+1b3	Al-Hasani_050_4631_3151_06.raw	0.08	350808	150957120	0.00232389	0.0580973
Met-enkephalin.YGGFM	1	+1y1	Al-Hasani_050_4631_3151_06.raw	0.08	801341	281569088	0.00284598	0.0711496
Met-enkephalin.YGGFM	1	+1y2	Al-Hasani_050_4631_3151_06.raw	0.08	349987	147694032	0.00236968	0.0592419
Met-enkephalin.YGGFM	1	+1b3	Al-Hasani_050_4631_3151_07.raw	0.1	356110	104273992	0.00341514	0.0853784
Met-enkephalin.YGGFM	1	+1y1	Al-Hasani_050_4631_3151_07.raw	0.1	765493	197468640	0.00387653	0.0969132
Met-enkephalin.YGGFM	1	+1y2	Al-Hasani_050_4631_3151_07.raw	0.1	328726	102959672	0.00319276	0.0798191
Met-enkephalin.YGGFM	1	+1b3	Al-Hasani_050_4631_3151_08.raw	0.25	1257471	142787072	0.00880662	0.220165
Met-enkephalin.YGGFM	1	+1y1	Al-Hasani_050_4631_3151_08.raw	0.25	2678751	262151312	0.0102183	0.255458
Met-enkephalin.YGGFM	1	+1y2	Al-Hasani_050_4631_3151_08.raw	0.25	1271427	136679248	0.00930227	0.232557
Met-enkephalin.YGGFM	1	+1b3	Al-Hasani_050_4631_3151_09.raw	0.5	3098177	155971872	0.0198637	0.496592
Met-enkephalin.YGGFM	1	+1y1	Al-Hasani_050_4631_3151_09.raw	0.5	6493331	292108672	0.0222292	0.555729
Met-enkephalin.YGGFM	1	+1y2	Al-Hasani_050_4631_3151_09.raw	0.5	3179954	151825232	0.0209448	0.523621
Met-enkephalin.YGGFM	1	+1b3	Al-Hasani_050_4631_3151_10.raw	1	3436883	84909888	0.0404768	1.01192
Met-enkephalin.YGGFM	1	+1y1	Al-Hasani_050_4631_3151_10.raw	1	7034303	157755040	0.04459	1.11475
Met-enkephalin.YGGFM	1	+1y2	Al-Hasani_050_4631_3151_10.raw	1	3596423	83437200	0.0431034	1.07758
Met-enkephalin.YGGFM	1	+1b3	Al-Hasani_050_4631_3151_11.raw	5	31848078	151383792	0.21038	5.25949
Met-enkephalin.YGGFM	1	+1y1	Al-Hasani_050_4631_3151_11.raw	5	62883192	281435200	0.223438	5.58594
Met-enkephalin.YGGFM	1	+1y2	Al-Hasani_050_4631_3151_11.raw	5	31445868	148005536	0.212464	5.3116
Met-enkephalin.YGGFM	1	+1b3	Al-Hasani_050_4631_3151_12.raw	0	0	181369904	0	0
Met-enkephalin.YGGFM	1	+1y1	Al-Hasani_050_4631_3151_12.raw	0	0	337146208	0	0
Met-enkephalin.YGGFM	1	+1y2	Al-Hasani_050_4631_3151_12.raw	0	0	177192816	0	0
Met-enkephalin.YGGFM	2	+1b3	Al-Hasani_050_4631_3152_01.raw	0.005	0	151070112	0	0
Met-enkephalin.YGGFM	2	+1y1	Al-Hasani_050_4631_3152_01.raw	0.005	7905	282798112	2.79528e-05	0.00069882
Met-enkephalin.YGGFM	2	+1y2	Al-Hasani_050_4631_3152_01.raw	0.005	0	147620176	0	0
Met-enkephalin.YGGFM	2	+1b3	Al-Hasani_050_4631_3152_02.raw	0.01	0	144570736	0	0
Met-enkephalin.YGGFM	2	+1y1	Al-Hasani_050_4631_3152_02.raw	0.01	46446	271438656	0.00017111	0.00427776
Met-enkephalin.YGGFM	2	+1y2	Al-Hasani_050_4631_3152_02.raw	0.01	0	142551904	0	0
Met-enkephalin.YGGFM	2	+1b3	Al-Hasani_050_4631_3152_03.raw	0.02	141586	144454256	0.000980144	0.0245036
Met-enkephalin.YGGFM	2	+1y1	Al-Hasani_050_4631_3152_03.raw	0.02	340327	269212064	0.00126416	0.031604
Met-enkephalin.YGGFM	2	+1y2	Al-Hasani_050_4631_3152_03.raw	0.02	109533	141404576	0.000774607	0.0193652
Met-enkephalin.YGGFM	2	+1b3	Al-Hasani_050_4631_3152_04.raw	0.04	164189	134144216	0.00122397	0.0305993
Met-enkephalin.YGGFM	2	+1y1	Al-Hasani_050_4631_3152_04.raw	0.04	401043	254982480	0.00157283	0.0393206
Met-enkephalin.YGGFM	2	+1y2	Al-Hasani_050_4631_3152_04.raw	0.04	173896	131880088	0.00131859	0.0329648
Met-enkephalin.YGGFM	2	+1b3	Al-Hasani_050_4631_3152_05.raw	0.06	248022	146507872	0.00169289	0.0423223
Met-enkephalin.YGGFM	2	+1y1	Al-Hasani_050_4631_3152_05.raw	0.06	582583	273162048	0.00213274	0.0533184
Met-enkephalin.YGGFM	2	+1y2	Al-Hasani_050_4631_3152_05.raw	0.06	242600	144062160	0.001684	0.0420999
Met-enkephalin.YGGFM	2	+1b3	Al-Hasani_050_4631_3152_06.raw	0.08	378319	142557776	0.00265379	0.0663449
Met-enkephalin.YGGFM	2	+1y1	Al-Hasani_050_4631_3152_06.raw	0.08	770392	267492176	0.00288005	0.0720014
Met-enkephalin.YGGFM	2	+1y2	Al-Hasani_050_4631_3152_06.raw	0.08	309809	141937360	0.00218272	0.0545679
Met-enkephalin.YGGFM	2	+1b3	Al-Hasani_050_4631_3152_07.raw	0.1	315126	105368504	0.0029907	0.0747676
Met-enkephalin.YGGFM	2	+1y1	Al-Hasani_050_4631_3152_07.raw	0.1	747961	194225184	0.003851	0.096275
Met-enkephalin.YGGFM	2	+1y2	Al-Hasani_050_4631_3152_07.raw	0.1	334238	102360616	0.0032653	0.0816325
Met-enkephalin.YGGFM	2	+1b3	Al-Hasani_050_4631_3152_08.raw	0.25	1246358	129625216	0.00961509	0.240377
Met-enkephalin.YGGFM	2	+1y1	Al-Hasani_050_4631_3152_08.raw	0.25	2517704	241376288	0.0104306	0.260765
Met-enkephalin.YGGFM	2	+1y2	Al-Hasani_050_4631_3152_08.raw	0.25	1207335	126839544	0.0095186	0.237965
Met-enkephalin.YGGFM	2	+1b3	Al-Hasani_050_4631_3152_09.raw	0.5	3052361	143507312	0.0212697	0.531743
Met-enkephalin.YGGFM	2	+1y1	Al-Hasani_050_4631_3152_09.raw	0.5	6065117	270665568	0.0224082	0.560204
Met-enkephalin.YGGFM	2	+1y2	Al-Hasani_050_4631_3152_09.raw	0.5	2919081	140763488	0.0207375	0.518437
Met-enkephalin.YGGFM	2	+1b3	Al-Hasani_050_4631_3152_10.raw	1	3463144	81263680	0.0426161	1.0654
Met-enkephalin.YGGFM	2	+1y1	Al-Hasani_050_4631_3152_10.raw	1	6686546	150583296	0.0444043	1.11011
Met-enkephalin.YGGFM	2	+1y2	Al-Hasani_050_4631_3152_10.raw	1	3380582	78987832	0.0427988	1.06997
Met-enkephalin.YGGFM	2	+1b3	Al-Hasani_050_4631_3152_11.raw	5	30333950	139587904	0.217311	5.43277
Met-enkephalin.YGGFM	2	+1y1	Al-Hasani_050_4631_3152_11.raw	5	59111624	259583968	0.227717	5.69292
Met-enkephalin.YGGFM	2	+1y2	Al-Hasani_050_4631_3152_11.raw	5	30013442	136722896	0.21952	5.48801
Met-enkephalin.YGGFM	2	+1b3	Al-Hasani_050_4631_3152_12.raw	0	0	175457472	0	0
Met-enkephalin.YGGFM	2	+1y1	Al-Hasani_050_4631_3152_12.raw	0	0	328740896	0	0
Met-enkephalin.YGGFM	2	+1y2	Al-Hasani_050_4631_3152_12.raw	0	0	174436864	0	0
Met-enkephalin.YGGFM	3	+1b3	Al-Hasani_050_4631_3153_01.raw	0.005	5138	143843680	3.57193e-05	0.000892983
Met-enkephalin.YGGFM	3	+1y1	Al-Hasani_050_4631_3153_01.raw	0.005	5967	266795776	2.23654e-05	0.000559136
Met-enkephalin.YGGFM	3	+1y2	Al-Hasani_050_4631_3153_01.raw	0.005	0	140352016	0	0
Met-enkephalin.YGGFM	3	+1b3	Al-Hasani_050_4631_3153_02.raw	0.01	0	134225408	0	0
Met-enkephalin.YGGFM	3	+1y1	Al-Hasani_050_4631_3153_02.raw	0.01	44373	251682768	0.000176305	0.00440763
Met-enkephalin.YGGFM	3	+1y2	Al-Hasani_050_4631_3153_02.raw	0.01	8337	132273760	6.30284e-05	0.00157571
Met-enkephalin.YGGFM	3	+1b3	Al-Hasani_050_4631_3153_03.raw	0.02	93324	144545680	0.000645637	0.0161409
Met-enkephalin.YGGFM	3	+1y1	Al-Hasani_050_4631_3153_03.raw	0.02	301726	275029344	0.00109707	0.0274267
Met-enkephalin.YGGFM	3	+1y2	Al-Hasani_050_4631_3153_03.raw	0.02	75070	141448112	0.000530725	0.0132681
Met-enkephalin.YGGFM	3	+1b3	Al-Hasani_050_4631_3153_04.raw	0.04	130020	132224768	0.000983326	0.0245831
Met-enkephalin.YGGFM	3	+1y1	Al-Hasani_050_4631_3153_04.raw	0.04	356492	248926864	0.00143212	0.0358029
Met-enkephalin.YGGFM	3	+1y2	Al-Hasani_050_4631_3153_04.raw	0.04	148028	129924944	0.00113933	0.0284834
Met-enkephalin.YGGFM	3	+1b3	Al-Hasani_050_4631_3153_05.raw	0.06	239245	147620016	0.00162068	0.040517
Met-enkephalin.YGGFM	3	+1y1	Al-Hasani_050_4631_3153_05.raw	0.06	634740	277152896	0.00229022	0.0572554
Met-enkephalin.YGGFM	3	+1y2	Al-Hasani_050_4631_3153_05.raw	0.06	199765	144142320	0.00138589	0.0346472
Met-enkephalin.YGGFM	3	+1b3	Al-Hasani_050_4631_3153_06.raw	0.08	332120	137711248	0.00241171	0.0602928
Met-enkephalin.YGGFM	3	+1y1	Al-Hasani_050_4631_3153_06.raw	0.08	813847	261732048	0.00310947	0.0777367
Met-enkephalin.YGGFM	3	+1y2	Al-Hasani_050_4631_3153_06.raw	0.08	327340	134655856	0.00243094	0.0607734
Met-enkephalin.YGGFM	3	+1b3	Al-Hasani_050_4631_3153_07.raw	0.1	313246	99199080	0.00315775	0.0789438
Met-enkephalin.YGGFM	3	+1y1	Al-Hasani_050_4631_3153_07.raw	0.1	690159	190847280	0.00361629	0.0904072
Met-enkephalin.YGGFM	3	+1y2	Al-Hasani_050_4631_3153_07.raw	0.1	312879	96613296	0.00323847	0.0809617
Met-enkephalin.YGGFM	3	+1b3	Al-Hasani_050_4631_3153_08.raw	0.25	1107849	124724840	0.00888234	0.222059
Met-enkephalin.YGGFM	3	+1y1	Al-Hasani_050_4631_3153_08.raw	0.25	2469648	231137488	0.0106848	0.267119
Met-enkephalin.YGGFM	3	+1y2	Al-Hasani_050_4631_3153_08.raw	0.25	1137828	122813784	0.00926466	0.231617
Met-enkephalin.YGGFM	3	+1b3	Al-Hasani_050_4631_3153_09.raw	0.5	3086985	144585760	0.0213505	0.533764
Met-enkephalin.YGGFM	3	+1y1	Al-Hasani_050_4631_3153_09.raw	0.5	6028592	271969280	0.0221664	0.554161
Met-enkephalin.YGGFM	3	+1y2	Al-Hasani_050_4631_3153_09.raw	0.5	2966174	142047552	0.0208816	0.522039
Met-enkephalin.YGGFM	3	+1b3	Al-Hasani_050_4631_3153_10.raw	1	3134031	75213440	0.0416685	1.04171
Met-enkephalin.YGGFM	3	+1y1	Al-Hasani_050_4631_3153_10.raw	1	6341961	139781392	0.0453706	1.13426
Met-enkephalin.YGGFM	3	+1y2	Al-Hasani_050_4631_3153_10.raw	1	2991968	73678000	0.0406087	1.01522
Met-enkephalin.YGGFM	3	+1b3	Al-Hasani_050_4631_3153_11.raw	5	28624410	131367792	0.217895	5.44738
Met-enkephalin.YGGFM	3	+1y1	Al-Hasani_050_4631_3153_11.raw	5	56231248	247741264	0.226976	5.67439
Met-enkephalin.YGGFM	3	+1y2	Al-Hasani_050_4631_3153_11.raw	5	27808220	130142272	0.213676	5.34189
Met-enkephalin.YGGFM	3	+1b3	Al-Hasani_050_4631_3153_12.raw	0	0	169469904	0	0
Met-enkephalin.YGGFM	3	+1y1	Al-Hasani_050_4631_3153_12.raw	0	0	318545600	0	0
Met-enkephalin.YGGFM	3	+1y2	Al-Hasani_050_4631_3153_12.raw	0	0	165697504	0	0
Met-enkephalin.YGGFM	4	+1b3	Al-Hasani_050_4631_3154_12.raw	0	39499	166461936	0.000237285	0.00593214
Met-enkephalin.YGGFM	4	+1y1	Al-Hasani_050_4631_3154_12.raw	0	190900	310771488	0.000614278	0.0153569
Met-enkephalin.YGGFM	4	+1y2	Al-Hasani_050_4631_3154_12.raw	0	25862	163398432	0.000158276	0.00395689
Met-enkephalin.YGGFM	5	+1b3	Al-Hasani_050_4631_3155_12.raw	0	9244	171775856	5.38143e-05	0.00134536
Met-enkephalin.YGGFM	5	+1y1	Al-Hasani_050_4631_3155_12.raw	0	30928	319663296	9.67518e-05	0.0024188
Met-enkephalin.YGGFM	5	+1y2	Al-Hasani_050_4631_3155_12.raw	0	0	168881072	0	0
Met-enkephalin.YGGFM	6	+1b3	Al-Hasani_050_4631_3156_12.raw	0	0	175579760	0	0
Met-enkephalin.YGGFM	6	+1y1	Al-Hasani_050_4631_3156_12.raw	0	12103	325061920	3.72329e-05	0.000930823
Met-enkephalin.YGGFM	6	+1y2	Al-Hasani_050_4631_3156_12.raw	0	0	172310304	0	0
Met-enkephalin.YGGFM	7	+1b3	Al-Hasani_050_4631_3157_12.raw	0	0	164701216	0	0
Met-enkephalin.YGGFM	7	+1y1	Al-Hasani_050_4631_3157_12.raw	0	6031	310193760	1.94427e-05	0.000486067
Met-enkephalin.YGGFM	7	+1y2	Al-Hasani_050_4631_3157_12.raw	0	0	160538592	0	0
Met-enkephalin.YGGFM	8	+1b3	Al-Hasani_050_4631_3158_12.raw	0	0	161868416	0	0
Met-enkephalin.YGGFM	8	+1y1	Al-Hasani_050_4631_3158_12.raw	0	0	300503552	0	0
Met-enkephalin.YGGFM	8	+1y2	Al-Hasani_050_4631_3158_12.raw	0	0	157676368	0	0
Met-enkephalin.YGGFM	9	+1b3	Al-Hasani_050_4631_3159_12.raw	0	0	164539968	0	0
Met-enkephalin.YGGFM	9	+1y1	Al-Hasani_050_4631_3159_12.raw	0	0	308156736	0	0
Met-enkephalin.YGGFM	9	+1y2	Al-Hasani_050_4631_3159_12.raw	0	0	158908480	0	0
