# Supplementary material for: Highly sensitive in vivo detection of dynamic changes in enkephalins following acute stress in mice
Source: eLife journal article supplement (doi:10.7554/elife.91609), 2023-11-17
Supplement: fig1-data1 [file LCMS_Data_figure1.xlsx]

## Sheet: Figure1F
	aCSF
	Mouse	049_M1	049_M2	052_M1	055_M2	055_M3	061_M0	063_M0	065_M2	068	069_M0	069_M1	070_M1	072_M1	074_M1	082_F0	083_F1	084_F2	084_F3	85_F0
	Leu-Enk (amol/sample)		1	1	35.761	1				1		1	1	1						1
	Met-Enk (amol/Sample)	1	61.916	67.379	108.697	43.721	38.189	1	1	29.838	1	21.944	1	1	1	58.9986	42.1957	43.3724	1	29
	High K+
	Mouse	049_M1	049_M2	052_M1	055_M2	055_M3	061_M0	063_M0	065_M2	068	069_M0	069_M1	070_M1	072_M1	074_M1	082_F0	083_F1	084_F2	084_F3	85_F0
	Leu-Enk (amol/sample)		93.072	98.398	325.711	1643.43				137.431		10.1136	44	82.0727						33
	Met-Enk (amol/Sample)	132.542	344.195	284	1012.74	4860.88	166.494	100.712	43.5306	379.937	30.3058	53.7111	220.159	240.974	250.613	399.175	1987.77	349.9	248.678	118

## Sheet: Figure1G-H
Mouse	Leu-Enk (amol/sample)	Met-Enk (amol/sample)
49	93.072	344.195
052_M1	98.398	452.371
055_M2	325.711	1012.74
055_M3	1643.43	4860.88
68	137.4	379.937
71	44	220.159
69	10	53.7111
72	102.73	210.752
85 F0	33	118
Line equation from regression	Y = 2.934*X + 39.28
