# Supplementary material for: Highly sensitive in vivo detection of dynamic changes in enkephalins following acute stress in mice
Source: eLife journal article supplement (doi:10.7554/elife.91609), 2023-11-17
Supplement: fig1-figsupp1-data1 [file elife-91609-fig1-figsupp1-data1-v1.zip]

## Sheet: _xltb_storage_
XL Toolbox Settings
	export_preset	<?xml version="1.0" encoding="utf-16"?>_x000D_ <Preset xmlns:xsi="http://www.w3.org/2001/XMLSchema-instance" xmlns:xsd="http://www.w3.org/2001/XMLSchema">_x000D_ <Name>Tiff, 500 dpi, RGB, Transparent canvas</Name>_x000D_ <Dpi>500</Dpi>_x000D_ <FileType>Tiff</FileType>_x000D_ <ColorSpace>Rgb</ColorSpace>_x000D_ <Transparency>TransparentCanvas</Transparency>_x000D_ <UseColorProfile>false</UseColorP…
	export_path	C:\Users\jmalone\Desktop\Al-Hassani mirror plots\L9Bot.tif

## Sheet: Sheet1
Retention Time	Intensity	Intensity
	y2 - 279.1703+	b2 - 221.0921+	b3 - 278.1135+
Retention Time	Intensity	Intensity	Intensity
31.867	0	0	0
31.8748	0	0	0
31.8826	0	0	0
31.8904	0	0	0
31.8982	0	0	0
31.906	0	0	0
31.9138	0	0	0
31.9216	0	0	0
31.9294	0	0	0
31.9372	0	0	0
31.945	0	0	0
31.9528	0	0	0
31.9606	0	0	0
31.9684	0	0	0
31.9762	0	0	0
31.984	0	0	0
31.9918	0	0	0
31.9996	0	0	0
32.0074	0	0	0
32.0152	0	0	0
32.023	0	0	0
32.0308	0	0	0
32.0386	0	0	0
32.0464	0	0	0
32.0542	0	0	0
32.062	0	0	0
32.0698	0	0	0
32.0776	0	0	0
32.0854	0	0	0
32.0932	0	0	0
32.101	0	0	0
32.1088	0	0	0
32.1166	0	0	0
32.1244	0	0	0
32.1322	0	0	0
32.14	0	0	0
32.1478	0	0	0
32.1556	0	0	0
32.1634	0	0	0
32.1712	0	0	0
32.179	0	0	0
32.1868	0	0	0
32.1946	0	0	0
32.2024	0	0	0
32.2102	0	0	0
32.218	0	0	0
32.2258	0	0	0
32.2336	0	0	0
32.2414	0	0	0
32.2492	0	0	0
32.257	0	0	0
32.2648	0	0	0
32.2726	0	0	0
32.2804	0	0	0
32.2882	0	0	0
32.296	0	0	0
32.3038	0	0	0
32.3116	0	0	0
32.3194	0	0	0
32.3272	0	0	0
32.335	0	0	0
32.3428	0	3832.24	0
32.3506	0	7170.68	0
32.3584	0	0	0
32.3662	0	0	0
32.374	0	0	0
32.3818	0	0	5907.53
32.3896	0	0	4149.78
32.3974	0	0	0
32.4052	0	0	0
32.413	0	0	0
32.4208	0	0	0
32.4286	0	0	0
32.4364	0	0	0
32.4442	0	0	0
32.452	0	0	0
32.4598	0	0	0
32.4676	0	0	0
32.4754	0	0	0
32.4832	0	0	0
32.491	0	0	0
32.4988	0	0	0
32.5066	0	0	0
32.5144	0	0	0
32.5222	0	0	0
32.53	0	0	0
32.5378	0	0	0
32.5456	0	0	0
32.5534	0	0	0
32.5612	0	0	0
32.569	0	0	0
32.5768	0	0	0
32.5846	0	0	0
32.5924	0	0	0
32.6002	0	0	0
32.608	0	0	0
32.6158	0	0	0
32.6236	0	0	0
32.6314	0	0	0
32.6392	0	0	0
32.647	0	0	0
32.6548	0	0	0
32.6626	0	0	0
32.6704	0	0	0
32.6782	0	0	0
32.686	0	0	0
32.6938	0	0	0
32.7016	0	0	0
32.7094	0	0	0
32.7172	0	0	0
32.725	0	0	0
32.7328	0	0	0
32.7406	0	0	0
32.7484	0	0	0
32.7562	0	0	0
32.764	0	0	0
32.7718	0	0	0
32.7796	0	0	0
32.7874	0	0	0
32.7952	0	0	0
32.803	0	0	0
32.8108	0	0	0
32.8186	0	0	0
32.8264	0	0	0
32.8342	0	0	0
32.842	0	0	0
32.8498	0	0	0
32.8576	0	0	0
32.8654	0	0	0
32.8732	0	0	0
32.881	0	0	0
32.8888	0	0	0
32.8966	0	0	0
32.9044	0	0	0
32.9122	0	0	0
32.92	0	0	0
Retention Time	Intensity	Intensity
	y2 - 286.1875+ (heavy)	b2 - 221.0921+ (heavy)	b3 - 278.1135+ (heavy)
Retention Time	Intensity	Intensity	Intensity
31.867	0	0	0
31.8748	0	0	0
31.8826	0	0	0
31.8904	0	0	0
31.8982	0	0	0
31.906	0	0	0
31.9138	0	0	0
31.9216	0	0	0
31.9294	0	0	0
31.9372	0	0	0
31.945	0	0	0
31.9528	0	0	0
31.9606	0	0	0
31.9684	0	0	0
31.9762	0	0	0
31.984	0	0	0
31.9918	0	0	0
31.9996	0	0	0
32.0074	0	0	0
32.0152	0	0	0
32.023	0	0	0
32.0308	0	0	0
32.0386	0	0	0
32.0464	0	0	0
32.0542	0	0	0
32.062	0	0	0
32.0698	0	0	0
32.0776	0	0	0
32.0854	0	0	0
32.0932	0	0	0
32.101	0	5608.51	0
32.1088	0	1622.38	0
32.1166	0	0	0
32.1244	0	0	0
32.1322	0	0	0
32.14	0	0	0
32.1478	0	0	0
32.1556	0	0	0
32.1634	0	0	0
32.1712	0	0	0
32.179	0	0	0
32.1868	0	0	0
32.1946	0	0	0
32.2024	0	0	0
32.2102	0	0	0
32.218	0	0	0
32.2258	0	0	0
32.2336	0	0	0
32.2414	0	0	31833
32.2492	0	18875	53094.3
32.257	37835.3	88202.3	147898
32.2648	96616.5	158111	334607
32.2726	220157	356437	871713
32.2804	413612	673937	1.54189e+06
32.2882	783104	1.23494e+06	2.69187e+06
32.296	1.29698e+06	2.11706e+06	4777585
32.3038	2.26407e+06	3.66308e+06	8091174
32.3116	3.70342e+06	5833341	13624208
32.3194	5513318	8.25076e+06	20362278
32.3272	7.39485e+06	10863594	27269928
32.335	9921553	15468379	35323544
32.3428	11555200	18619880	39614592
32.3506	13726935	22133904	48216232
32.3584	14012533	21613868	48216748
32.3662	12098047	19810832	44301364
32.374	10913598	16827020	39669064
32.3818	8467353	14684360	33172672
32.3896	7.07726e+06	11259467	26548228
32.3974	5259126	8431114	20191872
32.4052	3.81252e+06	6143567	14144005
32.413	2.55925e+06	4.08736e+06	9105492
32.4208	1.70781e+06	2694123	6.0754e+06
32.4286	1.16418e+06	1.88292e+06	4203875
32.4364	832958	1.33177e+06	3.06804e+06
32.4442	620460	959634	2.174e+06
32.452	488251	741675	1.73004e+06
32.4598	395378	621218	1495806
32.4676	328135	538142	1.22896e+06
32.4754	296851	458285	1.03794e+06
32.4832	248299	437656	972371
32.491	246868	364584	852543
32.4988	218350	336604	773618
32.5066	192286	321743	649307
32.5144	194102	280106	659137
32.5222	170983	268162	649828
32.53	152597	269007	583911
32.5378	136327	255907	537628
32.5456	124535	255826	475002
32.5534	106038	217074	447928
32.5612	112574	180934	446483
32.569	115904	177229	429323
32.5768	92014.5	174544	407601
32.5846	94959.5	151527	390402
32.5924	88536.2	141521	366107
32.6002	79331.7	137738	332819
32.608	93164.7	136002	325537
32.6158	91087.7	129404	288914
32.6236	94290.4	133639	287916
32.6314	90294.7	125625	290262
32.6392	73030.6	102467	283771
32.647	66846.9	94697.7	278363
32.6548	60142.5	105195	275148
32.6626	57722.8	104541	256623
32.6704	61371.5	98535.2	257034
32.6782	59607.5	93957.4	219930
32.686	59564.7	100091	217152
32.6938	50481.8	102116	227751
32.7016	57597.9	91152.7	212544
32.7094	55118.4	100050	196416
32.7172	48347.7	100904	201598
32.725	49383.7	99242.6	192152
32.7328	37347.1	85773.5	176278
32.7406	48354.9	93100.4	164580
32.7484	55490.9	87754.8	177512
32.7562	45385.6	72214.3	153404
32.764	45742.4	77367.5	153459
32.7718	42437.9	82216.5	170821
32.7796	35772.5	62111	151187
32.7874	35724.7	67456.7	126461
32.7952	30286.4	65175.7	147511
32.803	24577.9	44831	143298
32.8108	27051.3	47588.8	131164
32.8186	28953.5	56609	133787
32.8264	29888.5	61129	127646
32.8342	34182.6	49798.3	115150
32.842	29295.6	44687.3	123574
32.8498	32887.3	49984.6	114165
32.8576	25723.2	47326.6	112661
32.8654	22405.8	51103.5	107812
32.8732	24355.7	49691.1	107151
32.881	25687.5	44195.9	84037.3
32.8888	35261	40761.4	80229.7
32.8966	20723.8	46049.9	90288.1
32.9044	40224.5	44880.1	84153.7
32.9122	29981.3	41698.6	80823.9
32.92	24870.2	45099.6	82146.9
