# Supplementary material for: Highly sensitive in vivo detection of dynamic changes in enkephalins following acute stress in mice
Source: eLife journal article supplement (doi:10.7554/elife.91609), 2023-11-17
Supplement: fig1-figsupp1-data1 [file Suppl1a.xlsx]

## Sheet: _xltb_storage_
XL Toolbox Settings
	export_preset	<?xml version="1.0" encoding="utf-16"?>_x000D_ <Preset xmlns:xsi="http://www.w3.org/2001/XMLSchema-instance" xmlns:xsd="http://www.w3.org/2001/XMLSchema">_x000D_ <Name>Tiff, 500 dpi, RGB, Transparent canvas</Name>_x000D_ <Dpi>500</Dpi>_x000D_ <FileType>Tiff</FileType>_x000D_ <ColorSpace>Rgb</ColorSpace>_x000D_ <Transparency>TransparentCanvas</Transparency>_x000D_ <UseColorProfile>false</UseColorP…
	export_path	C:\Users\jmalone\Desktop\Al-Hassani mirror plots\M15 bot.tif

## Sheet: Sheet1
Retention Time	Intensity	Intensity
	y2 - 329.1166+	y1 - 182.0482+	b3 - 278.1135+
Retention Time	Intensity	Intensity	Intensity
22.234	0	0	0
22.2448	0	0	0
22.2556	0	0	0
22.2664	0	0	0
22.2772	0	0	0
22.288	0	0	0
22.2988	0	0	0
22.3096	0	0	0
22.3204	0	0	0
22.3312	0	0	0
22.342	0	0	0
22.3528	0	0	0
22.3636	0	0	0
22.3744	0	0	0
22.3852	0	0	0
22.396	0	0	0
22.4068	0	0	0
22.4176	0	0	0
22.4284	0	0	0
22.4392	0	0	0
22.45	0	0	0
22.4608	0	0	0
22.4716	0	0	0
22.4824	0	0	0
22.4932	0	0	0
22.504	0	0	0
22.5148	0	0	0
22.5256	0	0	0
22.5364	0	0	0
22.5472	0	0	0
22.558	0	0	0
22.5688	0	0	0
22.5796	0	0	0
22.5904	0	0	0
22.6012	0	51.0372	0
22.612	0	10752.7	0
22.6228	483.82	21504.1	433.683
22.6336	46705.8	52011.5	41996.3
22.6444	77764.9	152323	79716.4
22.6552	110284	224343	132562
22.666	231042	383417	207336
22.6768	300154	491593	273123
22.6876	347763	581855	324298
22.6984	356183	600838	340203
22.7092	330752	591906	317597
22.72	294510	472464	251819
22.7308	204204	375015	203454
22.7416	150172	254211	140083
22.7524	97980.7	155167	87434.3
22.7632	58786.6	99276.6	49448.8
22.774	42206.9	49894.9	39913.1
22.7848	22432.4	30853.9	20874.6
22.7956	23994.6	25545.6	9992.48
22.8064	11952.1	17576.1	0
22.8172	0	11987.3	0
22.828	0	0	0
22.8388	0	5069	0
22.8496	5169.37	10691.2	0
22.8604	11178.1	0	0
22.8712	0	0	0
22.882	0	0	0
22.8928	0	0	0
22.9036	0	0	0
22.9144	0	0	0
22.9252	0	0	0
22.936	0	0	0
22.9468	0	0	0
22.9576	0	0	0
22.9684	0	0	0
22.9792	0	0	0
22.99	0	0	0
23.0008	0	0	0
23.0116	0	0	0
23.0224	0	0	0
23.0332	0	0	0
23.044	0	0	0
23.0548	0	0	0
23.0656	0	0	0
23.0764	0	0	0
23.0872	0	0	0
23.098	0	0	0
23.1088	0	0	0
23.1196	0	0	0
23.1304	0	0	0
23.1412	0	0	0
23.152	0	0	0
23.1628	0	0	0
23.1736	0	0	0
23.1844	0	0	0
Retention Time	Intensity	Intensity
	y2 - 339.1438+ (heavy)	y1 - 182.0482+ (heavy)	b3 - 278.1135+ (heavy)
Retention Time	Intensity	Intensity	Intensity
22.234	0	0	0
22.2448	0	0	0
22.2556	0	0	0
22.2664	0	0	0
22.2772	0	0	0
22.288	0	0	0
22.2988	0	0	0
22.3096	0	0	0
22.3204	0	0	0
22.3312	0	0	0
22.342	0	0	0
22.3528	0	0	0
22.3636	14231	0	0
22.3744	25176.2	0	0
22.3852	21590.6	21127.5	16963.5
22.396	19639.1	45022.5	17578.5
22.4068	26775.6	54748.8	21122.5
22.4176	26810	50731.7	33496
22.4284	30567.1	60669.2	37506.3
22.4392	28631.8	36371	28190.5
22.45	23383.8	44855.5	23992.2
22.4608	3911.27	35630.3	19271.9
22.4716	18768.9	5672.74	3155.65
22.4824	3821.89	0	0
22.4932	0	0	0
22.504	0	0	0
22.5148	0	0	0
22.5256	0	0	0
22.5364	0	0	0
22.5472	0	0	0
22.558	0	0	0
22.5688	0	14869.9	9332.45
22.5796	16739.8	51937.5	23222.9
22.5904	93127	165519	92214.3
22.6012	247972	418512	244326
22.612	702238	1.20767e+06	650916
22.6228	1.38033e+06	2.3354e+06	1312655
22.6336	2.6652e+06	4.64496e+06	2570534
22.6444	4.78302e+06	8106789	4455636
22.6552	8894401	15978066	8750167
22.666	10437688	18577976	10303842
22.6768	14802365	26100068	13921308
22.6876	14776056	25443346	13802205
22.6984	14588081	24495046	13525953
22.7092	11859982	19048826	10758763
22.72	10050907	16278277	8820312
22.7308	6.92654e+06	12062099	6.23011e+06
22.7416	4.49712e+06	7963191	4220657
22.7524	2.68022e+06	4597291	2.55726e+06
22.7632	1.63931e+06	2.6816e+06	1.52887e+06
22.774	965877	1.6782e+06	899823
22.7848	674434	1.1668e+06	617441
22.7956	503048	810736	451565
22.8064	385816	651307	353137
22.8172	299265	503957	299923
22.828	261455	433493	257044
22.8388	223922	369036	229184
22.8496	213815	303671	187813
22.8604	166254	270428	155150
22.8712	173373	249917	142748
22.882	134981	223665	127977
22.8928	120371	249364	150386
22.9036	120496	207511	114596
22.9144	112984	182210	102206
22.9252	107245	176429	96707.8
22.936	86021	175042	107968
22.9468	82363.3	118116	85948.3
22.9576	77110.5	131000	84125
22.9684	78695.7	129504	71562.1
22.9792	77515.4	146937	65383.4
22.99	67249.6	116985	65439.6
23.0008	74634.3	110214	89928.6
23.0116	68424.1	109643	63691
23.0224	54581.1	100998	48626.1
23.0332	58471.2	97333.2	55836.8
23.044	60509	108068	46076.9
23.0548	58297.5	79508.6	39927.6
23.0656	57556.5	95354.4	28687.5
23.0764	64777.1	82057.2	31692.6
23.0872	50933.2	86383.2	30598
23.098	48488.8	73283.6	32236.3
23.1088	52145.3	81068.8	37654.8
23.1196	42019.6	67196.4	40048.4
23.1304	38063.4	63945	37500.7
23.1412	51664.3	55820.9	40259.8
23.152	48949.8	59503.5	32852.6
23.1628	32725.3	63462.5	31803.3
23.1736	29757.9	55789.3	31494.9
23.1844	34170.4	49985.7	36349.6
