# Supplementary material for: Highly sensitive in vivo detection of dynamic changes in enkephalins following acute stress in mice
Source: eLife journal article supplement (doi:10.7554/elife.91609), 2023-11-17
Supplement: fig1-figsupp1-data1 [file Suppl1b.xlsx]

## Sheet: _xltb_storage_
XL Toolbox Settings
	export_preset	<?xml version="1.0" encoding="utf-16"?>_x000D_ <Preset xmlns:xsi="http://www.w3.org/2001/XMLSchema-instance" xmlns:xsd="http://www.w3.org/2001/XMLSchema">_x000D_ <Name>Tiff, 500 dpi, RGB, Transparent canvas</Name>_x000D_ <Dpi>500</Dpi>_x000D_ <FileType>Tiff</FileType>_x000D_ <ColorSpace>Rgb</ColorSpace>_x000D_ <Transparency>TransparentCanvas</Transparency>_x000D_ <UseColorProfile>false</UseColorP…
	export_path	C:\Users\jmalone\Desktop\Al-Hassani mirror plots\M0915 bot.tif

## Sheet: Sheet1
Retention Time	Intensity	Intensity
	y2 - 329.1166+	y1 - 182.0482+	b3 - 278.1135+
Retention Time	Intensity	Intensity	Intensity
22.3827	0	0	0
22.3935	0	0	0
22.4043	0	0	0
22.4151	0	0	0
22.4259	0	0	0
22.4367	0	0	0
22.4475	0	0	0
22.4583	0	0	0
22.4691	0	0	0
22.4799	0	0	0
22.4907	0	0	0
22.5015	0	0	0
22.5123	0	0	0
22.5231	0	0	0
22.5339	0	0	0
22.5447	0	0	0
22.5555	0	0	0
22.5663	0	0	0
22.5771	0	0	0
22.5879	0	0	0
22.5987	0	0	0
22.6095	0	0	0
22.6203	0	0	0
22.6311	0	0	0
22.6419	0	0	0
22.6527	0	0	0
22.6635	0	0	0
22.6743	0	0	0
22.6851	0	0	0
22.6959	0	0	0
22.7067	0	0	0
22.7175	0	0	0
22.7283	0	0	0
22.7391	0	0	0
22.7499	0	0	0
22.7607	0	0	0
22.7715	0	0	0
22.7823	0	0	0
22.7931	0	0	0
22.8039	0	0	0
22.8147	0	0	0
22.8255	0	0	0
22.8363	0	0	0
22.8471	0	17189.6	0
22.8579	0	22433.2	9374.64
22.8687	0	4996.41	2861.01
22.8795	0	13154.8	0
22.8903	0	12466.5	0
22.9011	0	1827.01	0
22.9119	0	0	0
22.9227	0	0	0
22.9335	0	0	0
22.9443	0	0	0
22.9551	0	0	0
22.9659	0	0	0
22.9767	0	0	0
22.9875	0	0	0
22.9983	0	0	0
23.0091	0	0	0
23.0199	0	0	0
23.0307	0	0	0
23.0415	0	0	0
23.0523	0	0	0
23.0631	0	0	0
23.0739	0	0	0
23.0847	0	0	0
23.0955	0	0	0
23.1063	0	0	0
23.1171	0	0	0
23.1279	0	0	0
23.1387	0	0	0
23.1495	0	0	0
23.1603	0	0	0
23.1711	0	0	0
23.1819	0	0	0
23.1927	0	0	0
23.2035	0	0	0
23.2143	0	0	0
23.2251	0	0	0
23.2359	0	0	0
23.2467	0	0	0
23.2575	0	0	0
23.2683	0	0	0
23.2791	0	0	0
23.2899	0	0	0
23.3007	0	0	0
23.3115	0	0	0
23.3223	0	0	0
23.3331	0	0	0
23.3439	0	0	0
23.3547	0	0	0
23.3655	0	0	0
23.3763	0	0	0
23.3871	0	0	0
23.3979	0	0	0
Retention Time	Intensity
22.3766	0
Retention Time	Intensity
	y2 - 339.1438+ (heavy)	y1 - 182.0482+ (heavy)	b3 - 278.1135+ (heavy)
Retention Time	Intensity	Intensity	Intensity
22.3827	0	0	0
22.3935	0	0	0
22.4043	0	0	0
22.4151	0	0	0
22.4259	0	0	0
22.4367	0	0	0
22.4475	0	0	0
22.4583	0	0	0
22.4691	0	0	0
22.4799	0	0	0
22.4907	0	0	0
22.5015	0	0	0
22.5123	0	0	0
22.5231	0	5632.58	0
22.5339	5771.72	20584.7	5742.27
22.5447	20694.9	32765.7	19314.4
22.5555	38063.5	50214.5	34724.5
22.5663	54733	81509	50826
22.5771	70631.8	107867	53712.6
22.5879	79274.5	118582	50647.5
22.5987	74094.2	122249	52210.6
22.6095	65780.4	114119	54723.1
22.6203	47501.8	76116.7	52973.6
22.6311	34236.5	57184.9	37266.8
22.6419	23680.6	40625.8	21451.6
22.6527	15826.9	13321.4	10675.3
22.6635	0	0	0
22.6743	0	0	0
22.6851	0	0	0
22.6959	0	0	0
22.7067	0	0	0
22.7175	0	0	0
22.7283	0	8226.24	8455.12
22.7391	15455.3	38324.9	24559.9
22.7499	79814.1	143307	68577.3
22.7607	222433	416364	224985
22.7715	648753	1.14581e+06	642931
22.7823	1.53603e+06	2.57687e+06	1.45049e+06
22.7931	3.12688e+06	5.25841e+06	2919778
22.8039	5807169	10218619	5.53093e+06
22.8147	10535058	18085308	9966864
22.8255	15444942	26504948	14448375
22.8363	20639172	35984204	19363940
22.8471	24825058	42100144	22396934
22.8579	25992948	43318596	23489014
22.8687	24141336	40247660	23063348
22.8795	18882342	31316978	18194180
22.8903	14225453	23394380	12780042
22.9011	10477892	18004018	10130946
22.9119	6700729	12003677	6665632
22.9227	3.93532e+06	6901924	3.7642e+06
22.9335	2.34305e+06	3805824	2.19795e+06
22.9443	1.47523e+06	2380314	1.40887e+06
22.9551	1036008	1.67156e+06	985356
22.9659	791925	1.28268e+06	752175
22.9767	602097	996411	573473
22.9875	498485	819081	459166
22.9983	418514	732389	397699
23.0091	411580	663820	340115
23.0199	381288	593052	290489
23.0307	364994	582236	283061
23.0415	317478	550754	280477
23.0523	251182	470550	240968
23.0631	265945	433257	238698
23.0739	239371	418118	236765
23.0847	211250	381294	210768
23.0955	205956	345611	213544
23.1063	169256	321756	179541
23.1171	157715	297781	177086
23.1279	165490	258524	154178
23.1387	163363	256070	139893
23.1495	151660	270296	155186
23.1603	145998	256451	136533
23.1711	150140	238303	138072
23.1819	148714	242814	137580
23.1927	126492	206146	141439
23.2035	108945	220240	123499
23.2143	126138	201275	124877
23.2251	113512	178897	96648.7
23.2359	105986	195931	91687.1
23.2467	111494	177905	96974.3
23.2575	99295.5	164301	90482.1
23.2683	96912.2	168638	100186
23.2791	107648	165955	97018.6
23.2899	105519	156036	74075.7
23.3007	96907.7	143358	67686.2
23.3115	97809.5	155231	76674.4
23.3223	75533.2	127993	56755.2
23.3331	68298.4	136334	54834.3
23.3439	64056.7	91911.1	67636.3
23.3547	55536.4	126236	66551
23.3655	76909.4	124014	61940.1
23.3763	71750.2	112678	59554.2
23.3871	70651	100298	67615.7
23.3979	70454.2	96153.1	60428.2
