# Supplementary material for: Highly sensitive in vivo detection of dynamic changes in enkephalins following acute stress in mice
Source: eLife journal article supplement (doi:10.7554/elife.91609), 2023-11-17
Supplement: fig1-figsupp1-data1 [file Suppl1c.xlsx]

## Sheet: _xltb_storage_
XL Toolbox Settings
	export_preset	<?xml version="1.0" encoding="utf-16"?>_x000D_ <Preset xmlns:xsi="http://www.w3.org/2001/XMLSchema-instance" xmlns:xsd="http://www.w3.org/2001/XMLSchema">_x000D_ <Name>Tiff, 500 dpi, RGB, Transparent canvas</Name>_x000D_ <Dpi>500</Dpi>_x000D_ <FileType>Tiff</FileType>_x000D_ <ColorSpace>Rgb</ColorSpace>_x000D_ <Transparency>TransparentCanvas</Transparency>_x000D_ <UseColorProfile>false</UseColorP…
	export_path	C:\Users\jmalone\Desktop\Al-Hassani mirror plots\L15Bot.tif

## Sheet: Sheet1
Retention Time	Intensity
31.6119	0
Retention Time	Intensity
	y2 - 279.1703+	b2 - 221.0921+	b3 - 278.1135+
Retention Time	Intensity	Intensity	Intensity
31.5437	0	0	0
31.5515	0	0	0
31.5593	0	0	0
31.5671	0	0	0
31.5749	0	0	0
31.5827	0	0	0
31.5905	0	0	0
31.5983	0	0	0
31.6061	0	0	0
31.6139	0	0	0
31.6217	0	0	0
31.6295	0	0	0
31.6373	0	0	0
31.6451	0	0	0
31.6529	0	0	0
31.6607	0	0	0
31.6685	0	0	0
31.6763	0	0	0
31.6841	0	0	0
31.6919	0	0	0
31.6997	0	0	0
31.7075	0	0	0
31.7153	0	0	0
31.7231	0	0	0
31.7309	0	0	0
31.7387	0	0	0
31.7465	0	0	0
31.7543	0	0	0
31.7621	0	0	0
31.7699	0	0	0
31.7777	0	0	0
31.7855	0	0	0
31.7933	0	0	0
31.8011	0	0	0
31.8089	0	0	0
31.8167	0	0	0
31.8245	0	0	0
31.8323	0	0	0
31.8401	0	0	0
31.8479	0	0	0
31.8557	0	0	0
31.8635	0	0	0
31.8713	0	0	0
31.8791	0	0	0
31.8869	0	0	0
31.8947	0	0	0
31.9025	0	0	0
31.9103	0	0	0
31.9181	0	0	3587.03
31.9259	0	4334.79	12015.1
31.9337	0	9680.11	17622.8
31.9415	0	5340.74	34612.4
31.9493	8960.83	22860.1	59988.6
31.9571	20847.5	31369.6	87443.6
31.9649	31373.4	44345.5	115778
31.9727	50237.5	62050.2	138181
31.9805	42209.1	66611.2	160043
31.9883	37067.7	70382.7	173793
31.9961	35878	62069.4	161796
32.0039	35602.6	62607.8	161493
32.0117	36483.4	65289	129891
32.0195	10043.1	36288.2	90129.8
32.0273	13168.2	23774.4	72857.6
32.0351	17345.9	27268.9	49282
32.0429	12805.3	17321	26744.8
32.0507	1302.61	16736.8	32755.6
32.0585	0	1752.95	24607.2
32.0663	0	0	2429.56
32.0741	0	0	0
32.0819	0	0	0
32.0897	0	0	0
32.0975	0	0	0
32.1053	0	0	0
32.1131	0	0	0
32.1209	0	0	0
32.1287	0	0	0
32.1365	0	0	0
32.1443	0	0	0
32.1521	0	0	10405.5
32.1599	0	0	1423.46
32.1677	0	0	0
32.1755	0	0	0
32.1833	0	0	0
32.1911	0	0	0
32.1989	0	0	0
32.2067	0	0	0
32.2145	0	0	0
32.2223	0	0	0
32.2301	0	0	0
32.2379	0	0	0
32.2457	0	0	0
32.2535	0	0	0
32.2613	0	0	0
32.2691	0	0	0
32.2769	0	0	0
32.2847	0	0	0
32.2925	0	0	0
32.3003	0	0	0
32.3081	0	0	0
32.3159	0	0	0
32.3237	0	0	0
32.3315	0	0	0
32.3393	0	0	0
32.3471	0	0	0
32.3549	0	0	0
32.3627	0	0	0
32.3705	0	0	0
32.3783	0	0	0
32.3861	0	0	0
32.3939	0	0	0
32.4017	0	0	0
32.4095	0	0	0
32.4173	0	0	0
32.4251	0	0	0
32.4329	0	0	0
32.4407	0	0	0
32.4485	0	0	0
32.4563	0	0	0
32.4641	0	0	0
32.4719	0	0	0
32.4797	0	0	0
32.4875	0	0	0
32.4953	0	0	0
Retention Time	Intensity	Intensity
	y2 - 286.1875+ (heavy)	b2 - 221.0921+ (heavy)	b3 - 278.1135+ (heavy)
Retention Time	Intensity	Intensity	Intensity
31.5437	0	0	0
31.5515	0	0	0
31.5593	0	0	0
31.5671	0	0	0
31.5749	0	0	0
31.5827	0	0	0
31.5905	0	0	0
31.5983	0	0	0
31.6061	0	0	0
31.6139	0	0	0
31.6217	0	0	0
31.6295	0	0	0
31.6373	0	0	0
31.6451	0	0	0
31.6529	0	0	0
31.6607	0	0	0
31.6685	0	0	0
31.6763	0	0	0
31.6841	0	0	0
31.6919	0	0	0
31.6997	0	0	0
31.7075	0	0	0
31.7153	0	0	0
31.7231	0	0	0
31.7309	0	0	0
31.7387	0	0	0
31.7465	0	0	0
31.7543	0	0	0
31.7621	0	0	0
31.7699	0	0	0
31.7777	0	0	0
31.7855	0	0	0
31.7933	0	0	0
31.8011	0	0	0
31.8089	0	0	0
31.8167	0	0	0
31.8245	0	0	0
31.8323	0	0	0
31.8401	0	0	0
31.8479	0	0	0
31.8557	0	0	1389.73
31.8635	0	0	9367.88
31.8713	0	2279.65	3952.13
31.8791	0	20418.1	37131.2
31.8869	6545.86	45132.8	96245.8
31.8947	60042.3	90689.4	226541
31.9025	135701	210330	564286
31.9103	280429	466062	1.04388e+06
31.9181	540888	867958	2.03367e+06
31.9259	832533	1.43445e+06	3.16204e+06
31.9337	1406274	2.30974e+06	5.41124e+06
31.9415	2.40609e+06	3.90392e+06	8728191
31.9493	3.3327e+06	5.51969e+06	12460460
31.9571	4.60472e+06	7466840	16582096
31.9649	5911788	9103130	20887506
31.9727	6660146	10811290	24280898
31.9805	7.15385e+06	12287327	27159858
31.9883	7471910	12414137	27613930
31.9961	7.00079e+06	10926184	25565794
32.0039	5713303	8870204	20989748
32.0117	4.39059e+06	7033475	16087231
32.0195	3.45259e+06	5659972	12711883
32.0273	2442908	3.99134e+06	8867292
32.0351	1.61782e+06	2.56375e+06	5824631
32.0429	1.03466e+06	1.65487e+06	3.75483e+06
32.0507	690682	1.07438e+06	2414420
32.0585	445189	737054	1.65337e+06
32.0663	333217	558621	1.32053e+06
32.0741	287276	428364	996780
32.0819	226037	324103	800964
32.0897	184734	274351	755993
32.0975	163974	248331	619863
32.1053	131368	224797	518845
32.1131	112460	198113	473962
32.1209	95235.4	175364	409062
32.1287	112289	184141	382041
32.1365	94674.9	162168	362206
32.1443	84434.7	155617	388489
32.1521	80453.5	141353	323875
32.1599	87995.5	123697	281069
32.1677	74239.1	108916	258551
32.1755	68290.5	106297	250400
32.1833	72655	111472	242542
32.1911	65228.8	96327.7	227710
32.1989	56689.5	84520	215333
32.2067	60295.3	90806.4	198882
32.2145	50761.9	93334	173565
32.2223	50107	94568.2	175226
32.2301	46139.3	79706.5	168525
32.2379	55124.7	70406.6	156810
32.2457	49366.7	66396.9	158856
32.2535	36902.9	60325.8	139905
32.2613	38894	64158.1	137149
32.2691	37917.7	66706.8	135994
32.2769	50360.1	63009.2	125692
32.2847	38405.1	63066.2	121990
32.2925	32449.6	50185.4	110405
32.3003	28138.2	60119.2	131749
32.3081	32601.4	57152.2	132415
32.3159	34507	54698.1	121558
32.3237	30798.6	52190.3	120910
32.3315	25240.5	45906.6	112796
32.3393	24633.7	43636.2	96133.3
32.3471	30333	38592.6	105820
32.3549	29129	38126.3	94411.7
32.3627	26675.4	41874.8	81047.9
32.3705	16589.8	41367.6	81484
32.3783	23435.4	44614.3	99772.7
32.3861	33012.9	34261.1	83670.7
32.3939	20009.8	42463.4	79843.1
32.4017	18596.6	33817.3	88138.7
32.4095	22563.7	24897.3	81182.7
32.4173	16990.3	26829.9	72883.5
32.4251	17219.5	20604.5	74973.5
32.4329	4980.9	25908.4	73438.7
32.4407	13584.3	27391.2	67436.6
32.4485	27572.3	28144.8	65062.3
32.4563	17892	21917.9	63613.8
32.4641	3262.75	24536	60251.3
32.4719	9484.4	17643.1	50576.5
32.4797	2703.81	18865	59125.9
32.4875	0	25660.2	58459.5
32.4953	9494.06	14997.8	39020.8
