# Supplementary material for: Highly sensitive in vivo detection of dynamic changes in enkephalins following acute stress in mice
Source: eLife journal article supplement (doi:10.7554/elife.91609), 2023-11-17
Supplement: fig2-data1 [file elife-91609-fig2-data1-v1.zip]

## Sheet: Figure2A
	Handling
Mouse	055_M2	068	071	069_M0	051	059	066	061	063	064	065	072	072_M2	069_M1	057_M1	076_M0	076_M1	077_M1	083_F0	083_F1	084_F2	084_F3	85_F0	85_F1
Leu-Enk (amol/sample)	45.397	735.924	3731.85	29.0632	58.034	468.088	389.258	3044.18	67.5794	2477.94	1744.03	118.851	3523.74	14.1552	2840.04	145.434	178.257	526.006	7554.02	254.122	1766.59	3166.44	7790.82	2058.67
Met-Enk (amol/sample)	148.646	2434.22	10254.9	72.9909	202.374	1833.86	1044.15	9247.63	186.082	6199.81	4022.99	271.854	9661.34	271.42	7612.98	468.351	630.008	1583.33	25931.9	776.513	4825.61	8716.28	24815.5	8264.85
	Baseline
Mouse	055_M2	068	071	069_M0	051	059	066	061	063	064	065	072	072_M2	069_M1	057_M1	076_M0	076_M1	077_M1	083_F0	083_F1	084_F2	084_F3	85_F0	85_F1
Leu-Enk (amol/sample)	31.229	1	1	19.2257	1	1	11.122	48.306	1	65.7395	23.6553	1	102.73	12.0944	23.344	1	1	1	1	1	1	1	130.982	33.8713
Met-Enk (amol/sample)	96.527	107.195	130.179	45.7293	34.976	78.968	18.21	113.407	28.1505	126.245	44.3196	25.0585	210.752	27.9165	42.885	65.1528	60.1469	81.6006	123.782	36.3228	62.2368	92.55	347.925	120.128

## Sheet: Figure2B-C
Mouse	Leu-Enk (amol/sample)	Met-Enk (amol/sample)
052_M2	45.397	148.646
68	735.924	2434.22
71	3731.85	10254.9
69	29.0632	72.9909
51	58.034	202.374
59	468.088	1833.86
66	389.258	1044.15
61	3044.18	9247.63
63	67.5794	186.082
64	2477.94	6199.81
65	1744.03	4022.99
72	118.851	271.854
072_M2	3523.74	9661.34
057_M1	2840.04	7612.98
076_M1	145	468
076_M2	178	630
077_M1	526.006	1583.33
083_F0	7554.02	25931.9
083_F1	254.122	776.513
084_F2	1766.59	4825.61
084_F3	3166.44	8716.28
85_F0	7790.82	24815.5
85_F1	2058.67	8264.85
Line equation from regression	Y = 3.193*X - 311.2

## Sheet: Figure2I
	First Handling		Second Handling		Third Handling
	Before handling avg z-score	After handling avg z-score	Before handling avg z-score	After handling avg z-score	Before handling avg z-score	After handling avg z-score
3343	-0.150493	0.415864	0.020003	0.189683	-0.511849	-0.741076
3290	-0.771856	-0.910864	0.266991	0.275422	-0.384566	-0.342525
3292	-0.084912	0.505131	0.178717	0.320406	0.153294	0.196286
3293	-0.246563	-0.689042	0.275948	0.013237	0.101177	0.169991
3252	-0.58174	-0.899449	-0.502204	-1.64454	-0.059509	-0.775132
3255	-0.170443	1.09455	-0.32099	0.722881	0.077265	-0.050096
3282	-0.096878	-0.51542	-0.270758	-0.392511	-0.14898	2.07531
285	0.109456	0.994214	-0.067668	0.058036	-0.009172	0.450593
3283	-0.037233	-0.044425	-0.107883	-0.161783	-0.075946	0.07553
3345	-0.230165	1.38205	-0.031872	1.46002	-0.11525	0.427927
