# Supplementary material for: Highly sensitive in vivo detection of dynamic changes in enkephalins following acute stress in mice
Source: eLife journal article supplement (doi:10.7554/elife.91609), 2023-11-17
Supplement: fig2-figsupp1-data1 [file elife-91609-fig2-figsupp1-data1-v1.zip]

## Sheet: suppl fig2a
	Baseline males
Mouse ID	055_M2	068-F	071	069_M0	051	059	066	061	063	064	065-F	072	072_M2	069_M1	057_M1	076_M0	076_M1	077_M1	083_F0	083_F1	084_F2	084_F3	85-F0	85_F1
Leu Enk amol/sample	31.229		1	19.2257	1	1	11.122	48.306	1	65.7395		1	102.73	12.0944	23.344	1	1	1
Met-Enk amol/sample	96.527		130.179	45.7293	34.976	78.968	18.21	113.407	28.1505	126.245		25.0585	210.752	27.9165	42.885	65.1528	60.1469	81.6006
	Handling males
Mouse ID	055_M2	068-F	071	069_M0	051	059	066	061	063	064	065-F	072	072_M2	069_M1	057_M1	076_M0	076_M1	077_M1	083_F0	083_F1	084_F2	084_F3	85-F0	85_F1
Leu Enk amol/sample	45.397		3731.85	29.0632	58.034		468.088	389.258	3044.18	67.5794	2477.94		118.851	3523.74	14.1552	2840.04	145.434	178.257	526.006
Met-Enk amol/sample	148.646		10254.9	72.9909	202.374		1833.86	1044.15	9247.63	186.082	6199.81		271.854	9661.34	271.42	7612.98	468.351	630.008	1583.33
	Baseline Females
Mouse ID	055_M2	068-F	071	069_M0	051	059	066	061	063	064	065-F	072	072_M2	069_M1	057_M1	076_M0	076_M1	077_M1	083_F0	083_F1	084_F2	084_F3	85-F0	85_F1
Leu Enk amol/sample		1									23.6553								1	1	1	1	130.982	33.8713
Met-Enk amol/sample		107.195									44.3196								123.782	36.3228	62.2368	92.55	347.925	120.128
	Connection to lines Females
Mouse ID	055_M2	068-F	071	069_M0	051	059	066	061	063	064	065-F	072	072_M2	069_M1	057_M1	076_M0	076_M1	077_M1	083_F0	083_F1	084_F2	084_F3	85-F0	85_F1
Leu Enk amol/sample		735.924									1744.03								7554.02	254.122	1766.59	3166.44	7790.82	2058.67
Met-Enk amol/sample		2434.22									4022.99								25931.9	776.513	4825.61	8716.28	24815.5	8264.85

## Sheet: supplfig2b
	Baseline Met-Enk amol/sample
Mouse ID	052_M1	055_M2	066_M1	061_M0	068_F	070_M1	077	083_F1	084_F2	085_F0	085_F2
Males	57	1	17	50		1	67
Females					31.954			27.5449	1	146.618	67.1034
	Fox Odor exposure amol/sample
Mouse ID	052_M1	055_M2	066_M1	061_M0	068_F	070_M1	077	083_F1	084_F2	085_F0	085_F2
Males	629.946	161.817	30.16	40.827		20.0463	59
Females					28.418			250.797	45	69.8087	47.4257
