# Supplementary material for: Highly sensitive in vivo detection of dynamic changes in enkephalins following acute stress in mice
Source: eLife journal article supplement (doi:10.7554/elife.91609), 2023-11-17
Supplement: fig3-data1 [file elife-91609-fig3-data1-v1.zip]

## Sheet: Figure3C
	First fox urine		Second fox urine		Third fox urine
Mouse ID	Before exposure avg z-score	After exposure avg z-score	Before exposure avg z-score	After exposure avg z-score	Before exposure avg z-score	After exposure avg z-score
3345	-0.320495	1.58466	-0.184066	0.262833	0.005359	0.21461
3343	0.184333	1.5711	-0.038273	-0.263068	0.350707	-0.139587
3290	-0.064323	0.556748	0.124877	-0.098689	-0.085197	0.220598
3292	-0.081837	0.313286	-0.176524	0.038857	-0.053544	-0.143397
3293	0.103787	0.952847	0.027559	-0.128163	-0.144133	-0.237735
284	-0.000334	2.3228	0.60222	0.174749	0.335938	0.025527
285	0.198776	2.70574	0.208474	0.007906	-0.693266	-0.422055
3252	0.038787	0.75021	-0.22512	-0.675341	-0.357516	-1.07005
3282	-0.010943	2.86713	0.332439	0.479405	-0.273561	-0.255734

## Sheet: Figure3F
	Baseline
Mouse	052_M1	055_M2	066_M1	061_M0	68	070_M1	77	083_F1	084_F2	085_F0	085_F2
Met-Enk (amol/sample)	57	1	17	50	31.954	1	67	27.5449	1	146.618	67.1034
	Fox Urine
Mouse	052_M1	055_M2	066_M1	061_M0	68	070_M1	77	083_F1	084_F2	085_F0	085_F2
Met-Enk (amol/sample)	629.946	161.817	30.16	40.827	28.418	20.0463	59	250.797	45	69.8087	47.4257
