# Supplementary material for: Highly sensitive in vivo detection of dynamic changes in enkephalins following acute stress in mice
Source: eLife journal article supplement (doi:10.7554/elife.91609), 2023-11-17
Supplement: fig3-figsupp2-data1 [file elife-91609-fig3-figsupp2-data1-v1.zip]

## Sheet: supplfig4c
	First exposure		2nd exposure
mouse ID	Before water avg z-score	After water avg z-score	Before water avg z-score	After water avg z-score
3290_first_water	-0.137638	0.815871	-0.053021	0.340349
3292_first_water	0.122361	1.08898	0.015523	0.248094
3293_first_water	-0.178599	-0.286697	-0.061559	-0.05889
3343_first_water	0.102726	1.41023	0.037495	0.187012
3345_first_water	0.011269	2.90589	0.138074	0.335585
